# Supplementary material for: Utilizing perhalopyridine-based alkynes as suitable precursors for the synthesis of novel poly(1,2,3-triazolyl)-substituted perhalopyridines
Source: Royal Society of Chemistry journal article supplement (doi:10.1039/d4ra05861e), 2024-01-01
Supplement: d4ra05861e1.pdf [file d4ra05861e1.pdf]

Electronic Supplementary Information

For

**Utilizing perhalopyridine-based alkynes as suitable precursors for the synthesis of novel poly(1,2,3-triazolyl)-substituted perhalopyridines**

Fereshteh Khorasani<sup>a</sup>, Reza Ranjbar-Karimi<sup>\*a</sup> and Kazem Mohammadiannejad<sup>b</sup>

<sup>a</sup>Department of Chemistry, Vali-e-Asr University of Rafsanjan, Rafsanjan 77176, Islamic Republic of Iran.

<sup>b</sup>NMR Laboratory, Faculty of Science, Vali-e-Asr University of Rafsanjan, Rafsanjan 77176, Islamic Republic of Iran.

\*Corresponding author, Fax: +98-343-131-2429; Tel: +98-343-131-2429, E-mail: [r.ranjbarkarimi@vru.ac.ir](mailto:r.ranjbarkarimi@vru.ac.ir) (R. Rnjbar-Karimi).

1. Crystal structure of **3a**.

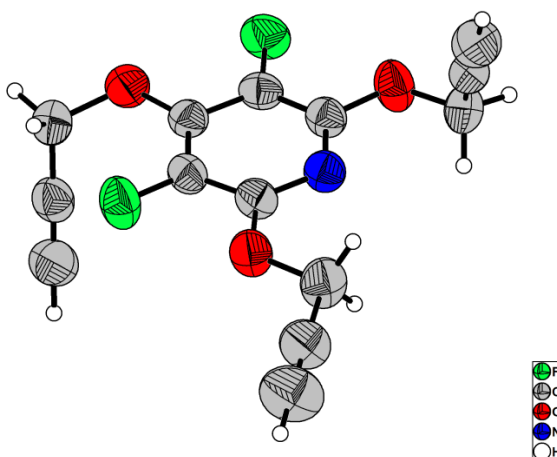

2. Crystal structure

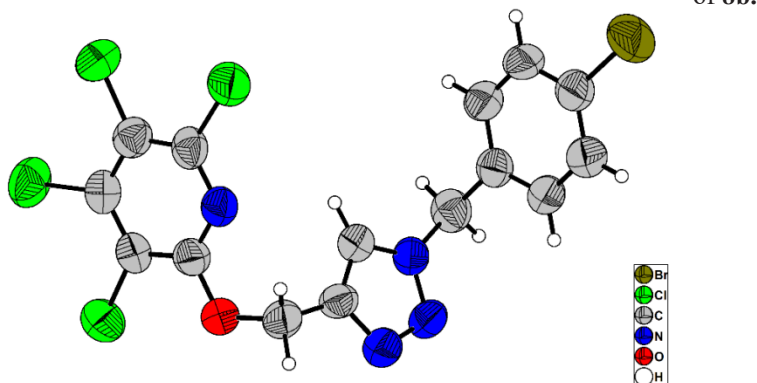

### 3. NMR spectra of the synthesized compounds **3a-c**

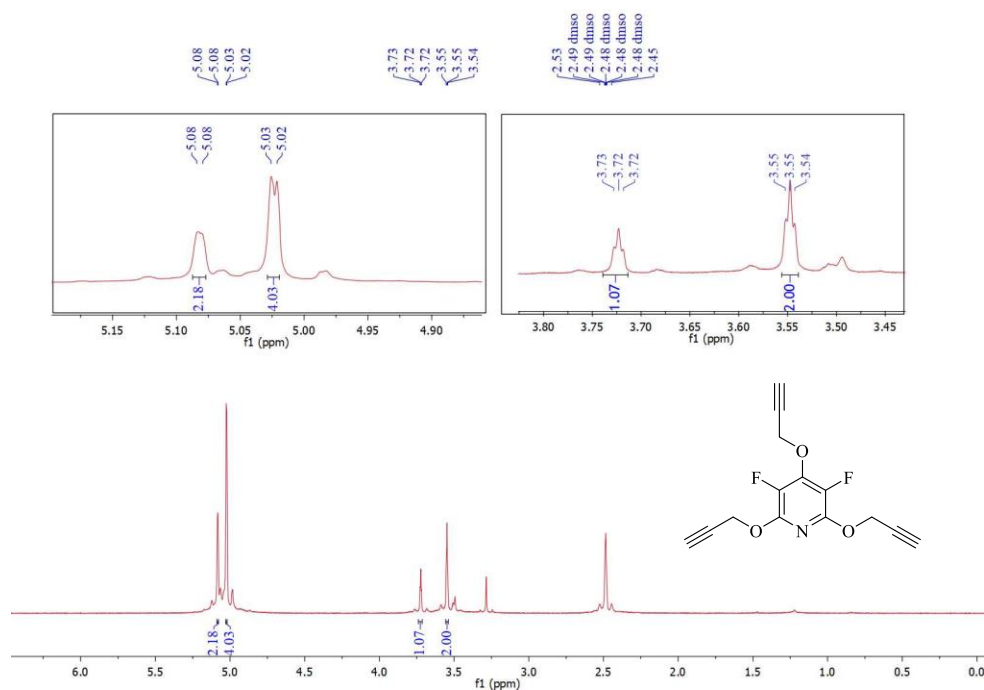

$^1\text{H}$  NMR spectrum of 3,5-difluoro-2,4,6-tris(prop-2-yn-1-yloxy)pyridine **3a**

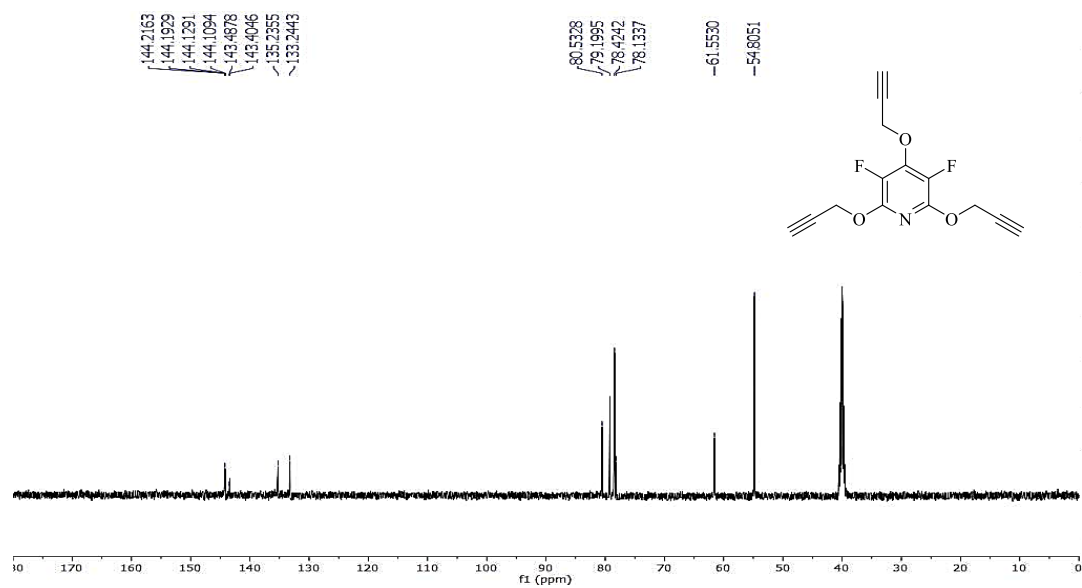

$^{13}\text{C}$  NMR spectrum of 3,5-difluoro-2,4,6-tris(prop-2-yn-1-yloxy)pyridine **3a**

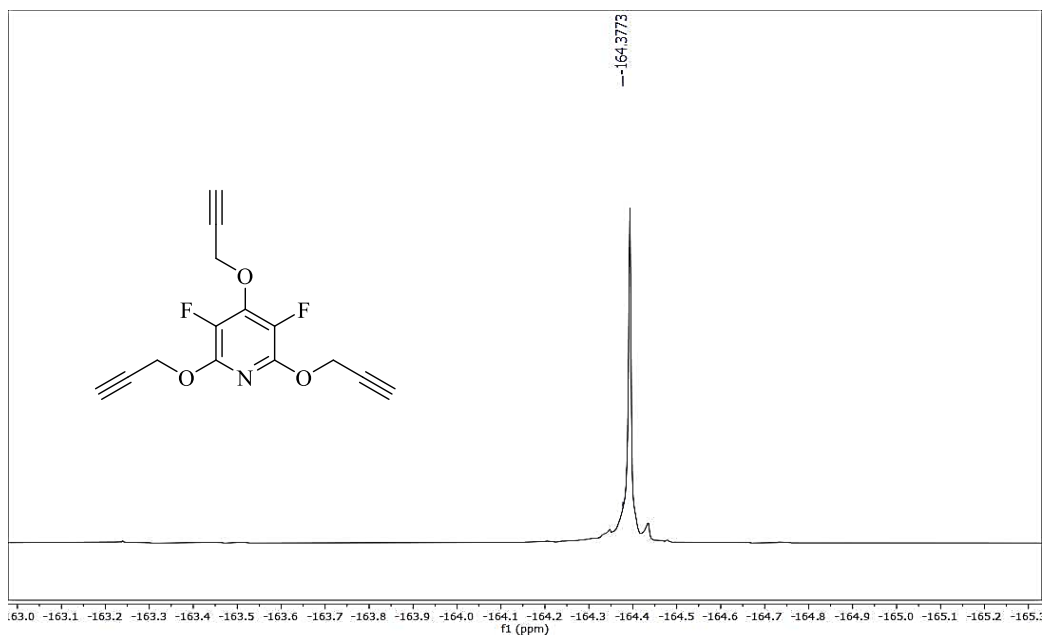

$^{19}\text{F}$  NMR spectrum of 3,5-difluoro-2,4,6-tris(prop-2-yn-1-yloxy)pyridine **3a**

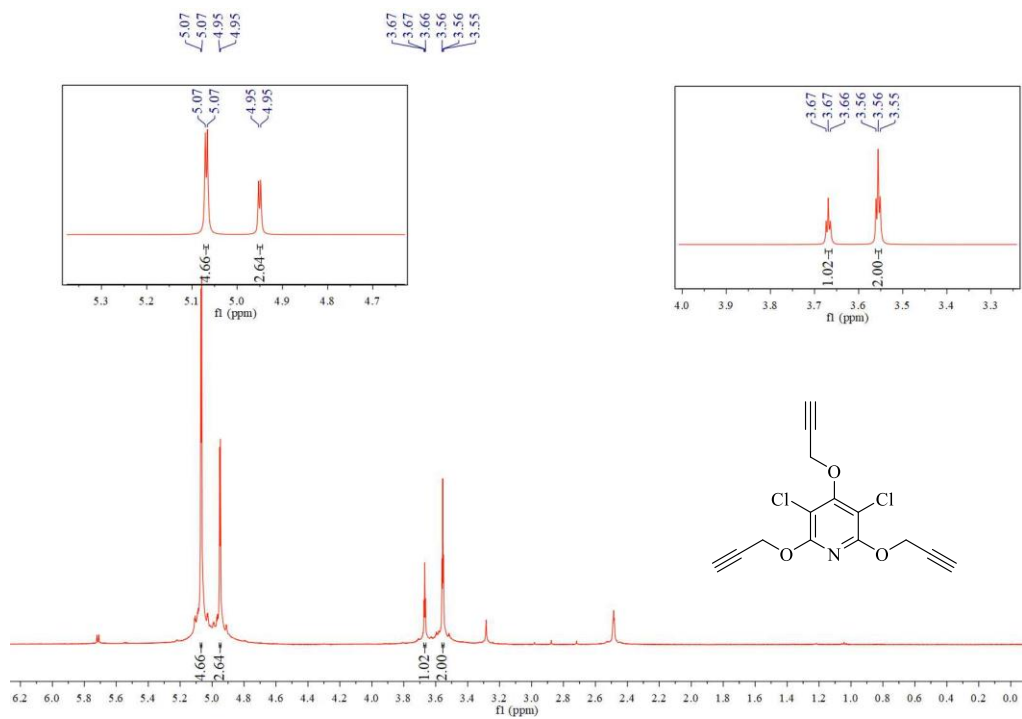

$^1\text{H}$  NMR spectrum of 3,5-dichloro-2,4,6-tris(prop-2-yn-1-yloxy)pyridine **3b**

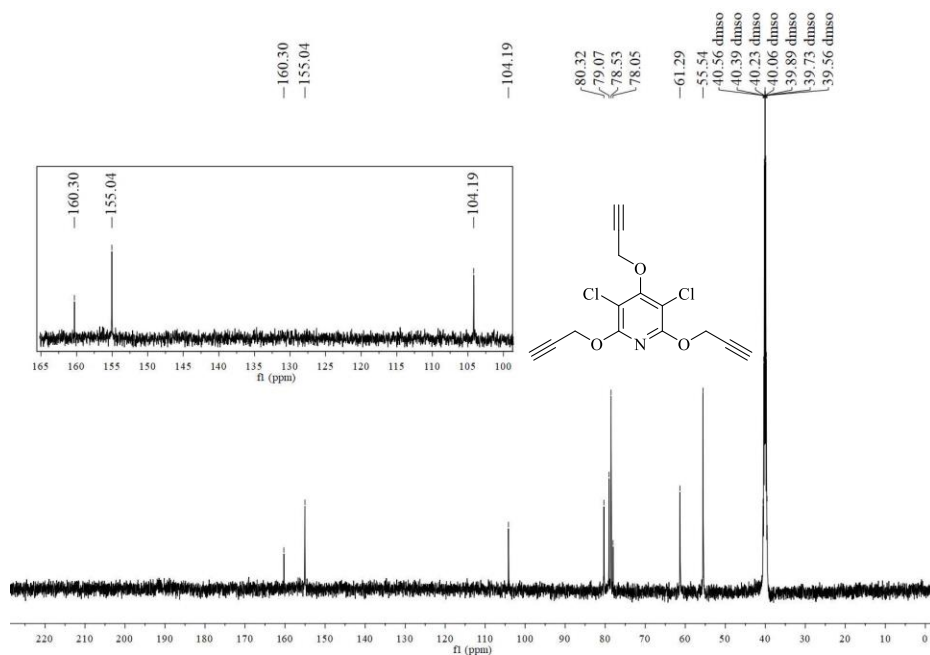

**13C NMR spectrum of 3,5-dichloro-2,4,6-tris(prop-2-yn-1-yloxy)pyridine **3b****

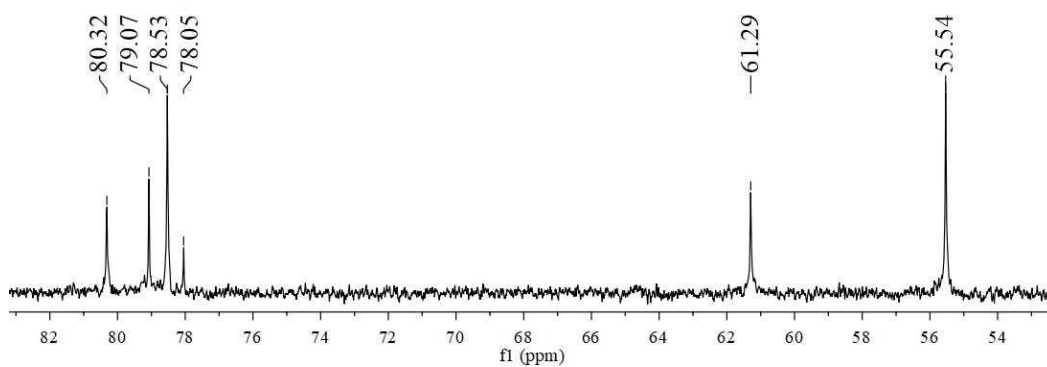

**Expanded 13C NMR spectrum of 3,5-dichloro-2,4,6-tris(prop-2-yn-1-yloxy)pyridine **3b****

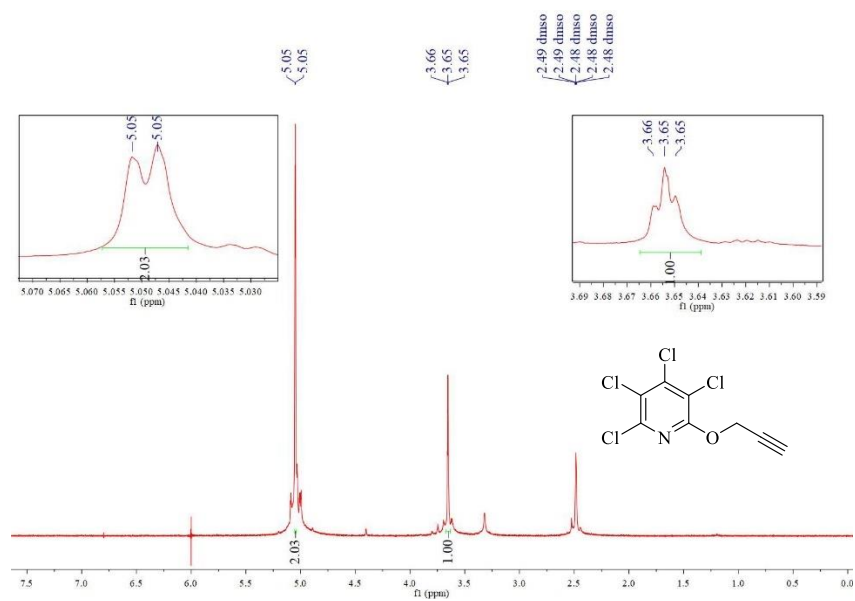

<sup>1</sup>H NMR spectrum of 2,3,4,5-tetrachloro-6-(prop-2-yn-1-yloxy)pyridine **3c**

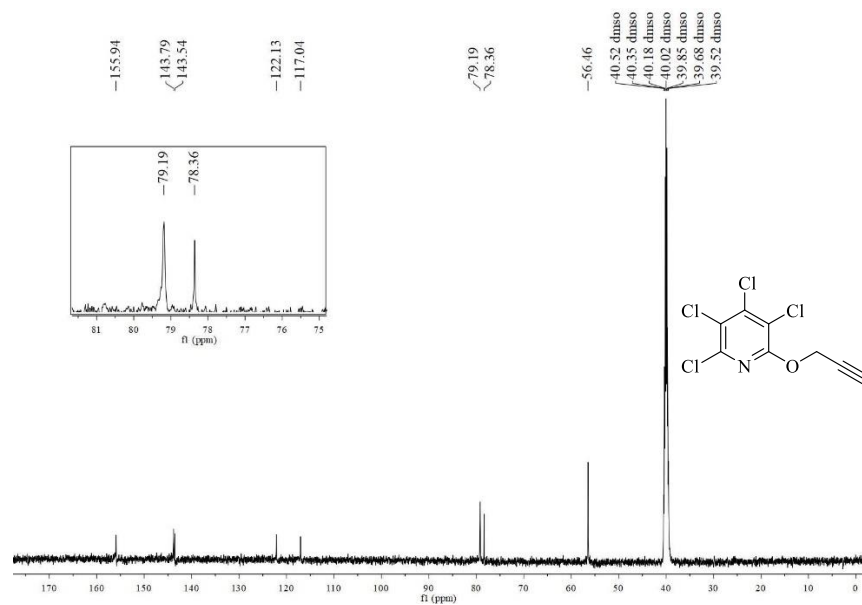

<sup>13</sup>C NMR spectrum of 2,3,4,5-tetrachloro-6-(prop-2-yn-1-yloxy)pyridine **3c**

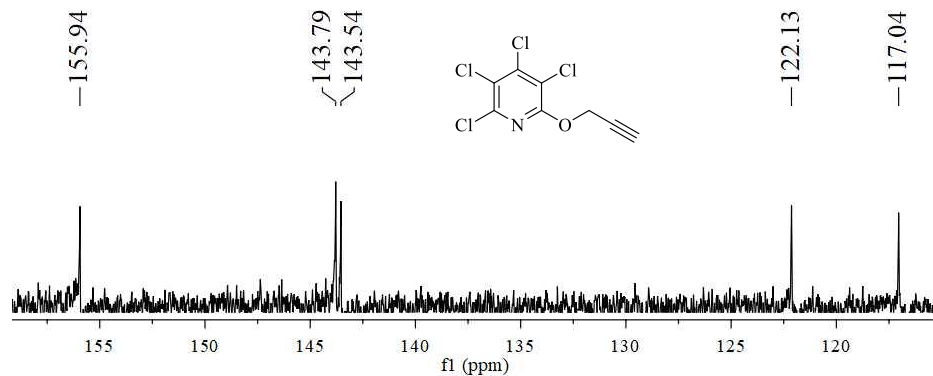

Expanded <sup>13</sup>C NMR spectrum of 2,3,4,5-tetrachloro-6-(prop-2-yn-1-yloxy)pyridine **3c**

## 6. NMR spectra of synthesized tris(1,2,3-triazoles) **5a-f** and **7a-d**

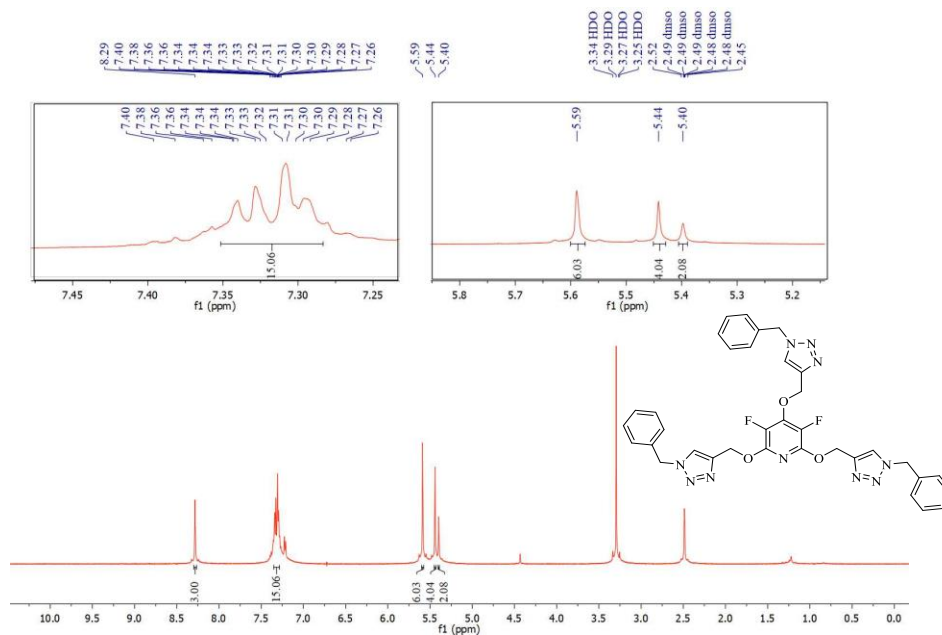

<sup>1</sup>H NMR spectrum of 2,4,6-tris((1-benzyl-1H-1,2,3-triazol-4-yl)methoxy)-3,5-difluoropyridine **5a**

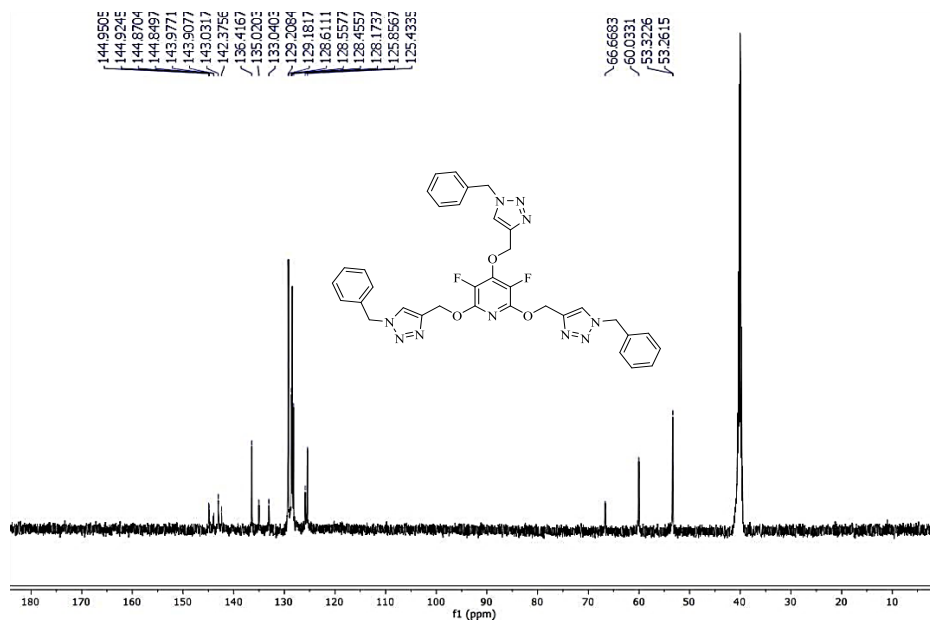

<sup>13</sup>C NMR spectrum of 2,4,6-tris((1-benzyl-1H-1,2,3-triazol-4-yl)methoxy)-3,5-difluoropyridine **5a**

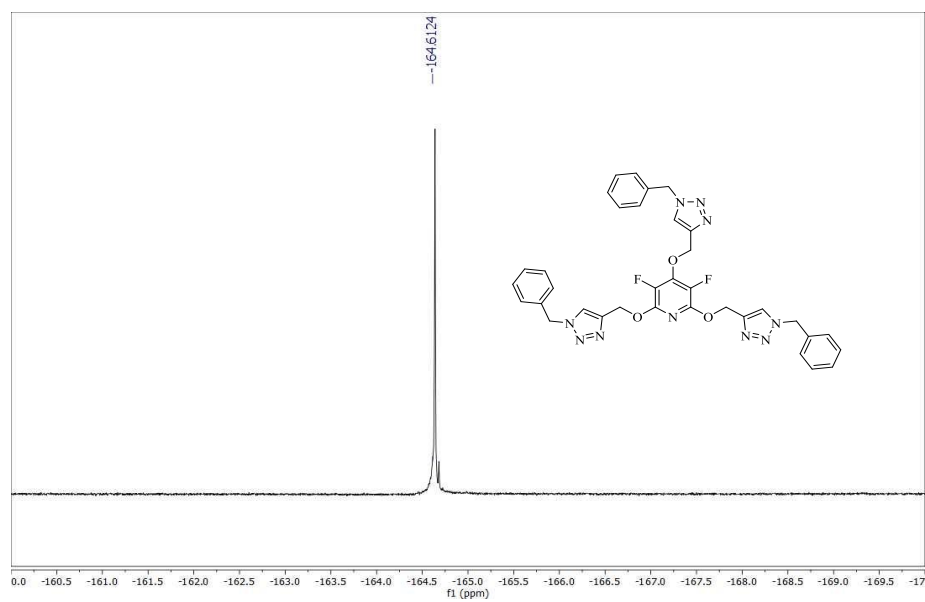

<sup>19</sup>F NMR spectrum of 2,4,6-tris((1-benzyl-1H-1,2,3-triazol-4-yl)methoxy)-3,5-difluoropyridine **5a**

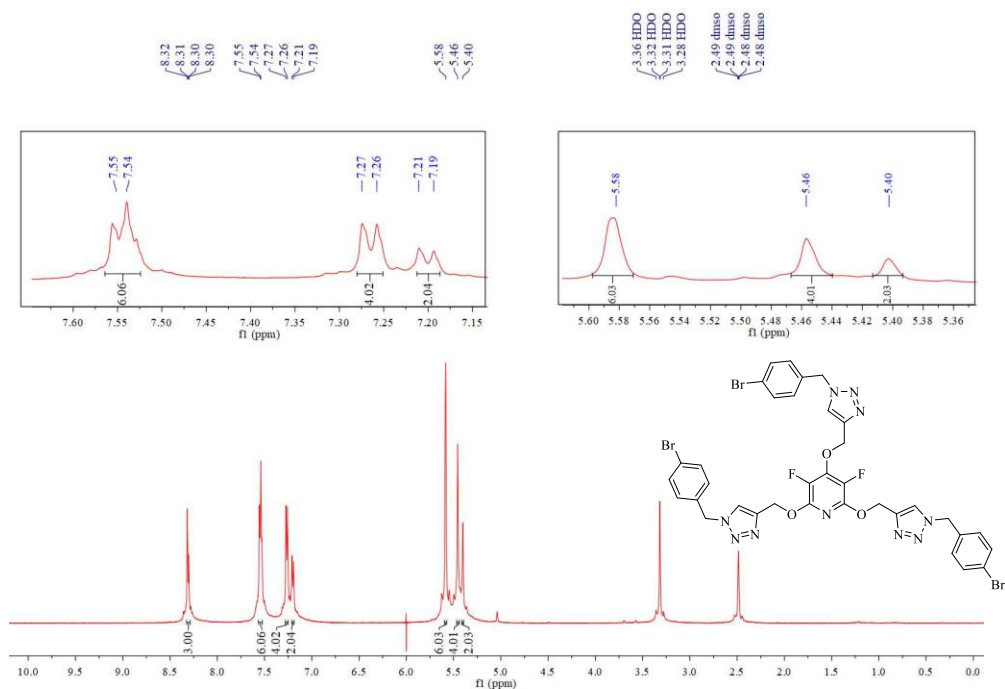

**<sup>1</sup>H NMR spectrum of 2,4,6-tris((1-(4-bromobenzyl)-1H-1,2,3-triazol-4-yl)methoxy)-3,5-difluoropyridine **5b****

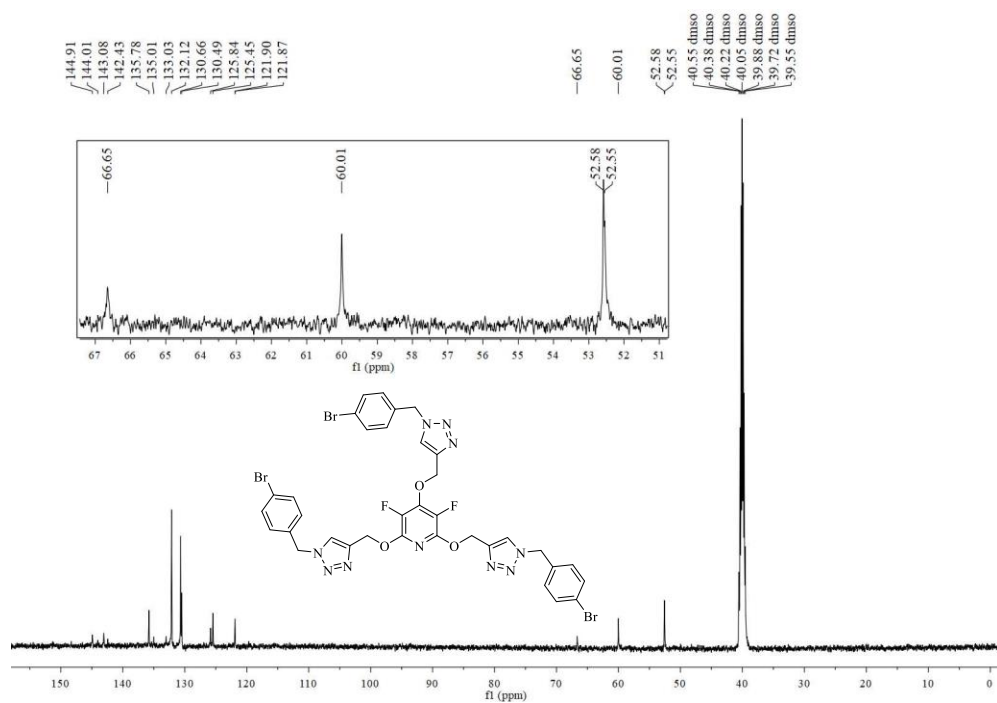

**<sup>13</sup>C NMR spectrum of 2,4,6-tris((1-(4-bromobenzyl)-1H-1,2,3-triazol-4-yl)methoxy)-3,5-difluoropyridine **5b****



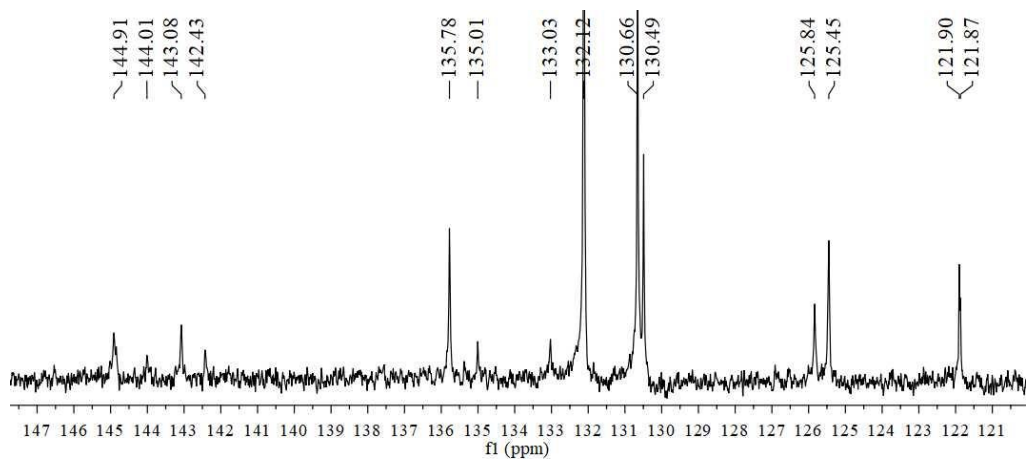

Expanded  $^{13}\text{C}$  NMR spectrum of 2,4,6-tris((1-(4-bromobenzyl)-1H-1,2,3-triazol-4-yl)methoxy)-3,5-difluoropyridine **5b**

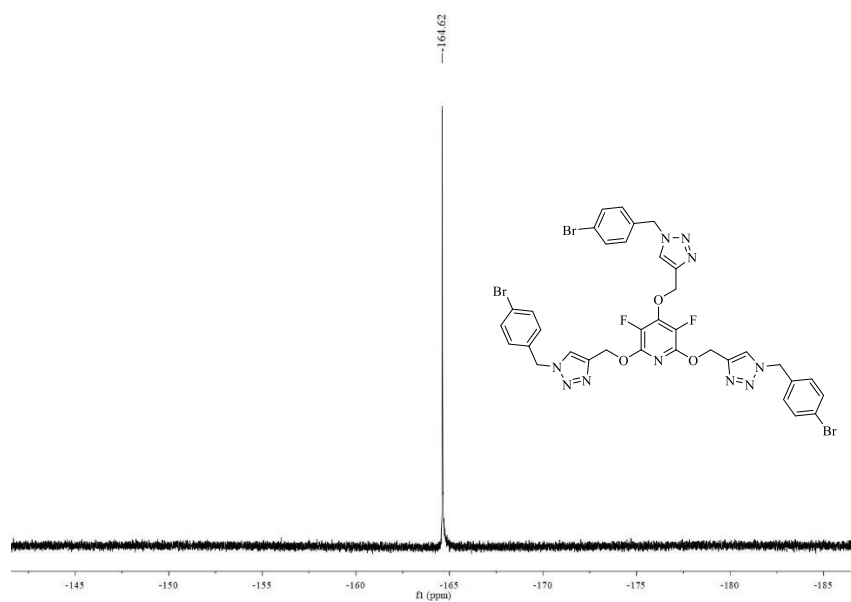

$^{19}\text{F}$  NMR spectrum of 2,4,6-tris((1-(4-bromobenzyl)-1H-1,2,3-triazol-4-yl)methoxy)-3,5-difluoropyridine **5b**

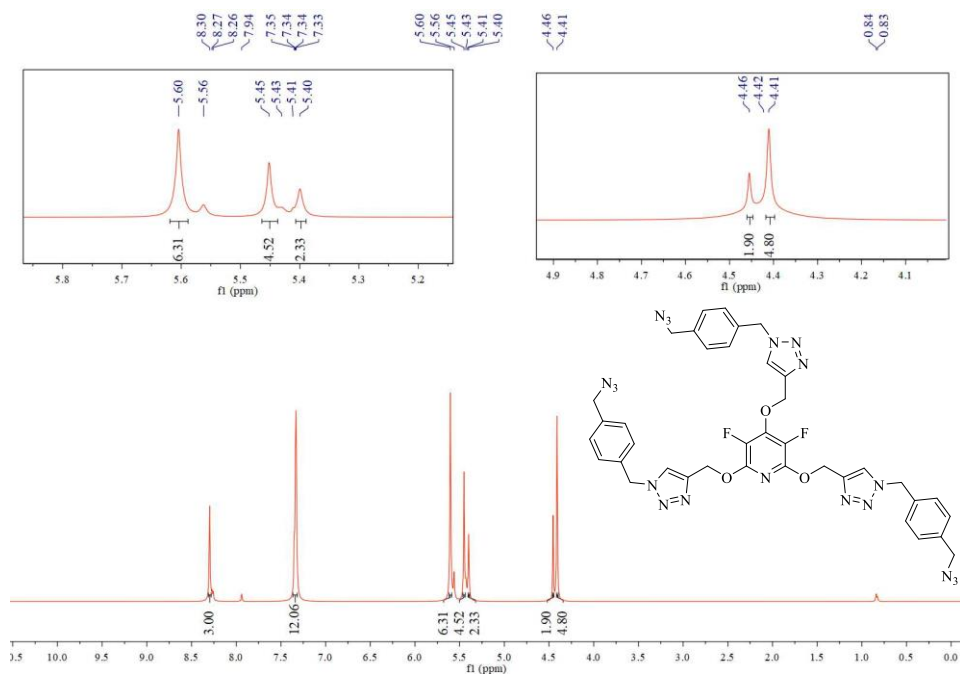

<sup>1</sup>H NMR spectrum of 2,4,6-tris((1-(4-(azidomethyl)benzyl)-1H-1,2,3-triazol-4-yl)methoxy)-3,5-difluoropyridine **5c**

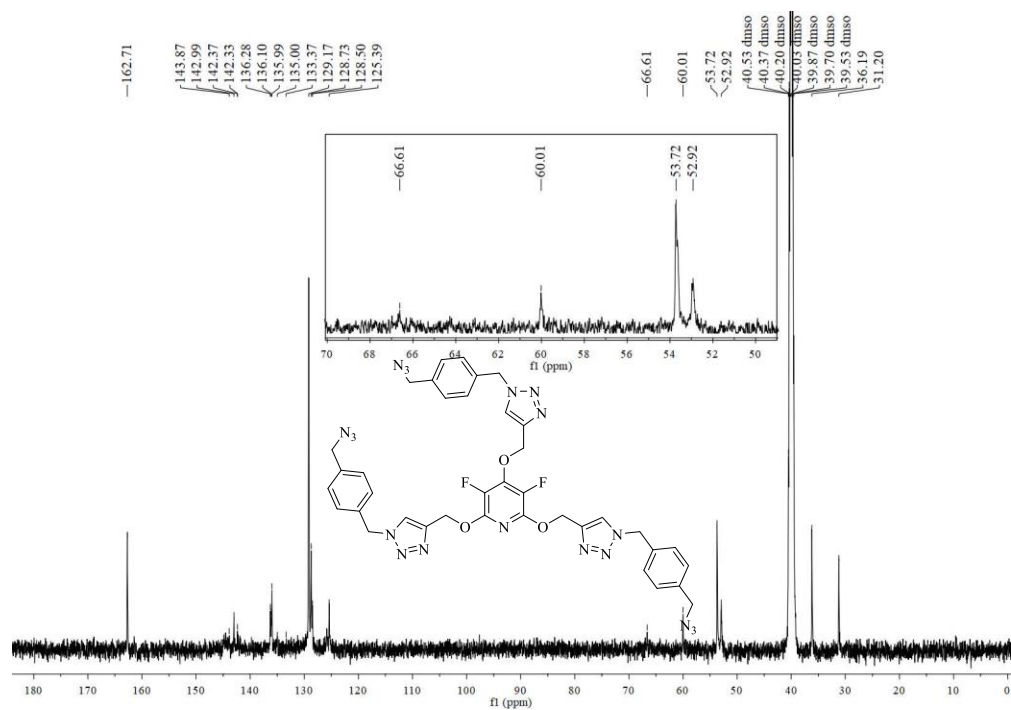

<sup>13</sup>C NMR spectrum of 2,4,6-tris((1-(4-(azidomethyl)benzyl)-1H-1,2,3-triazol-4-yl)methoxy)-3,5-difluoropyridine **5c**

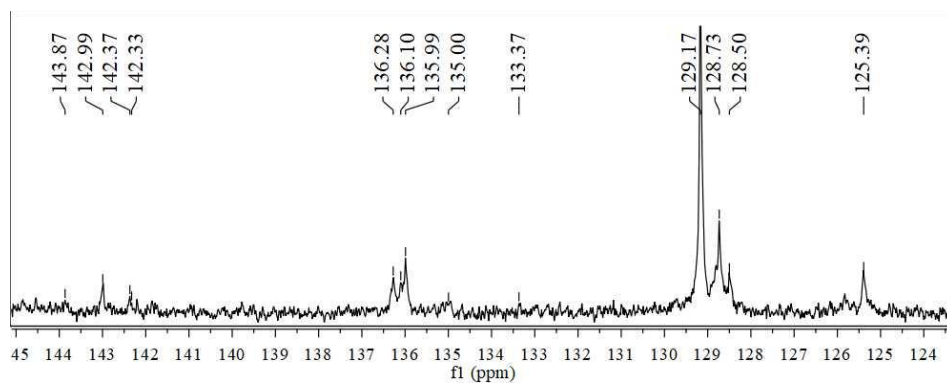

Expanded  $^{13}\text{C}$  NMR spectrum of 2,4,6-tris((1-(4-(azidomethyl)benzyl)-1H-1,2,3-triazol-4-yl)methoxy)-3,5-difluoropyridine **5c**

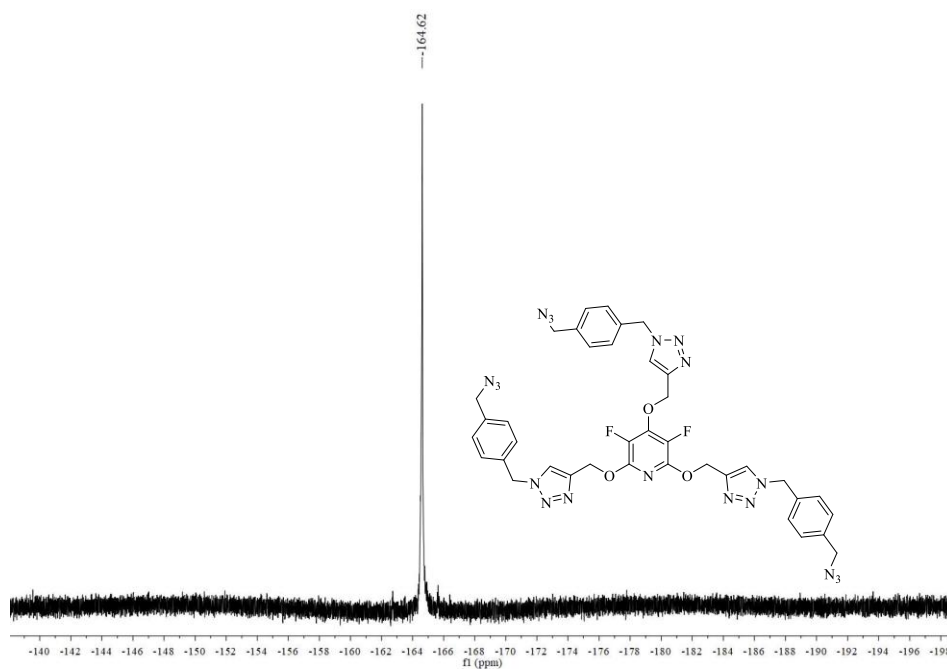

$^{19}\text{F}$  NMR spectrum of 2,4,6-tris((1-(4-(azidomethyl)benzyl)-1H-1,2,3-triazol-4-yl)methoxy)-3,5-difluoropyridine **5c**

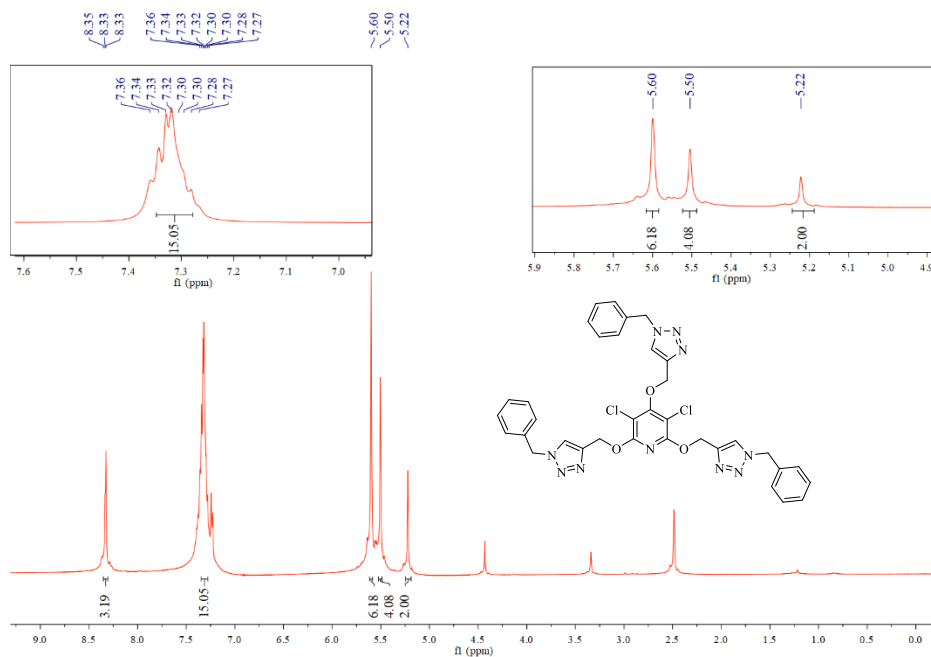

<sup>1</sup>H NMR spectrum of 2,4,6-tris((1-benzyl-1H-1,2,3-triazol-4-yl)methoxy)-3,5-dichloropyridine **5d**

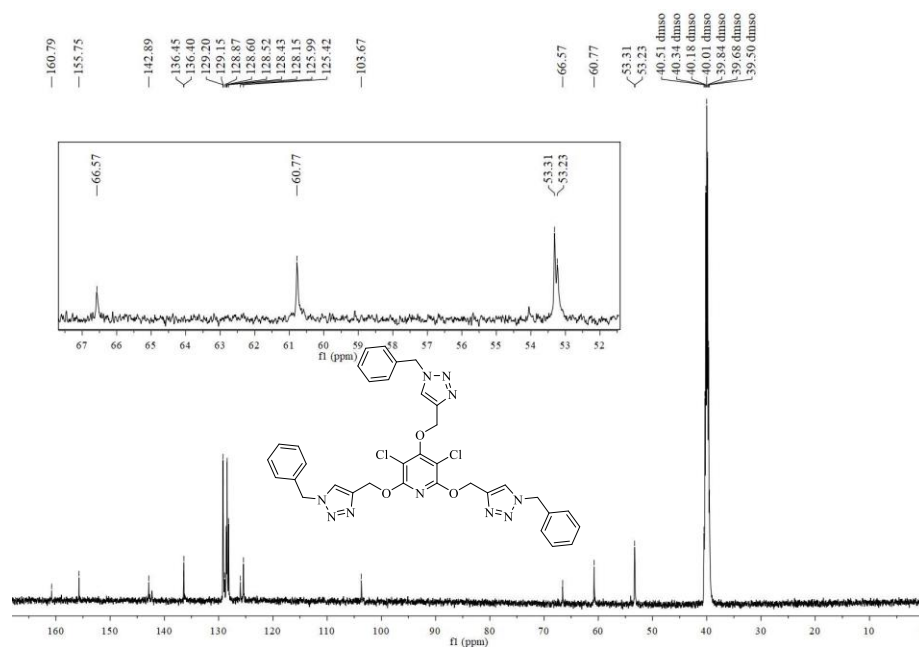

<sup>13</sup>C NMR spectrum of 2,4,6-tris((1-benzyl-1H-1,2,3-triazol-4-yl)methoxy)-3,5-dichloropyridine **5d**

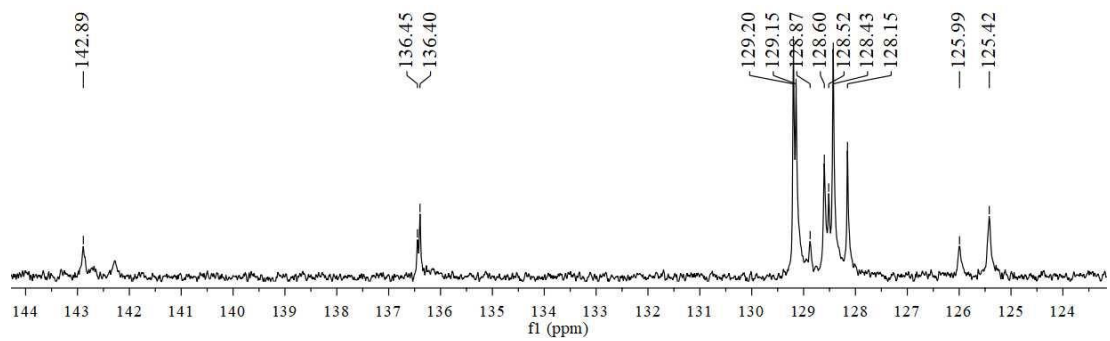

Expanded  $^{13}\text{C}$  NMR spectrum of 2,4,6-tris((1-benzyl-1H-1,2,3-triazol-4-yl)methoxy)-3,5-dichloropyridine **5d**

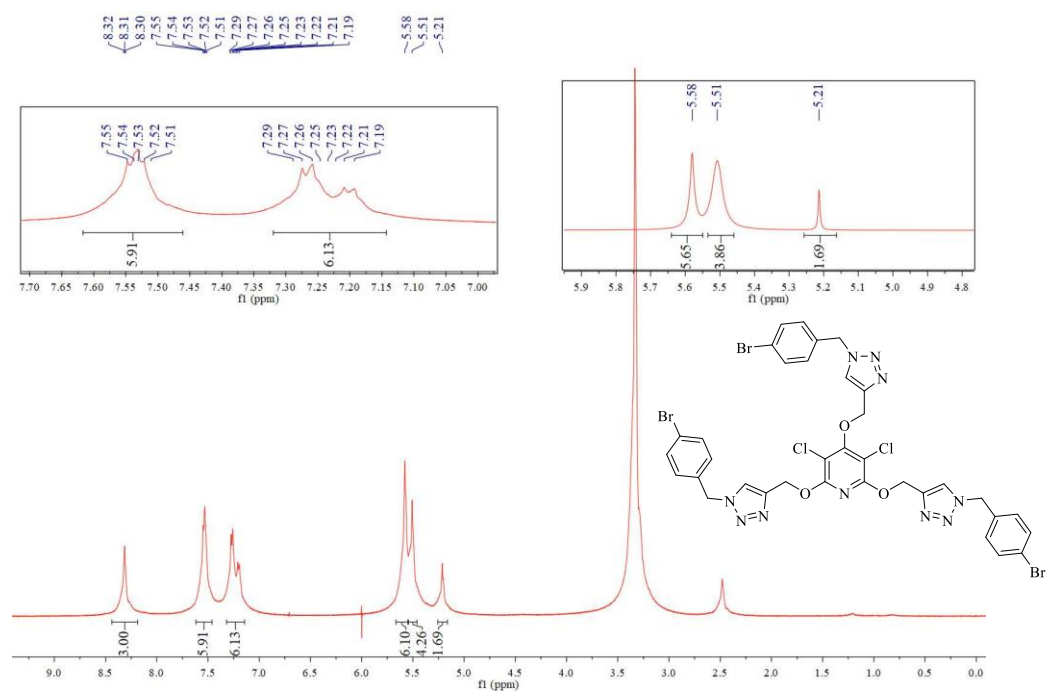

$^1\text{H}$  NMR spectrum of 2,4,6-tris((1-(4-bromobenzyl)-1H-1,2,3-triazol-4-yl)methoxy)-3,5-dichloropyridine **5e**

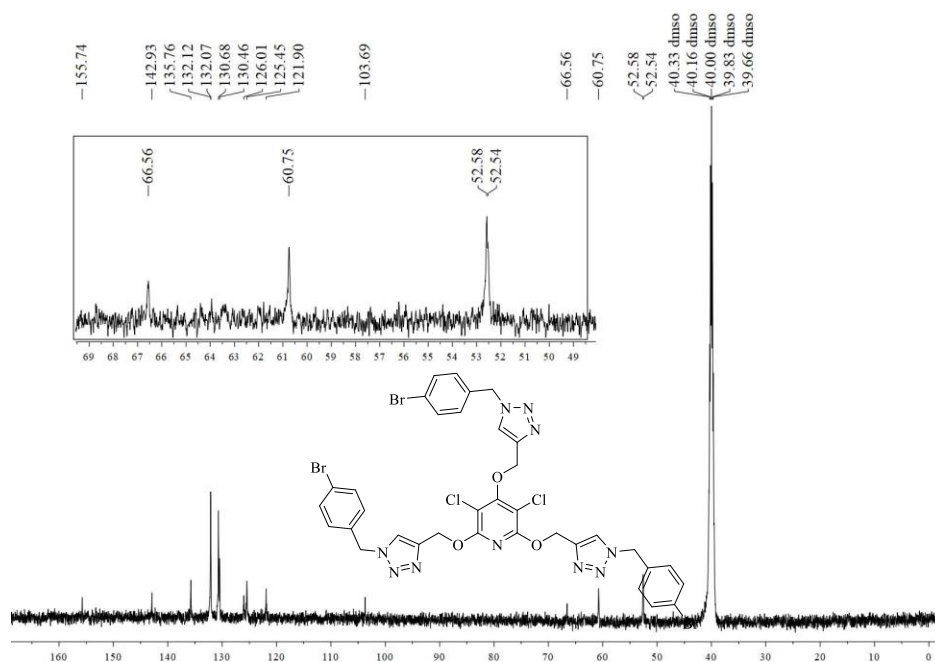

<sup>13</sup>C NMR spectrum of 2,4,6-tris((1-(4-bromobenzyl)-1H-1,2,3-triazol-4-yl)methoxy)-3,5-dichloropyridine **5e**

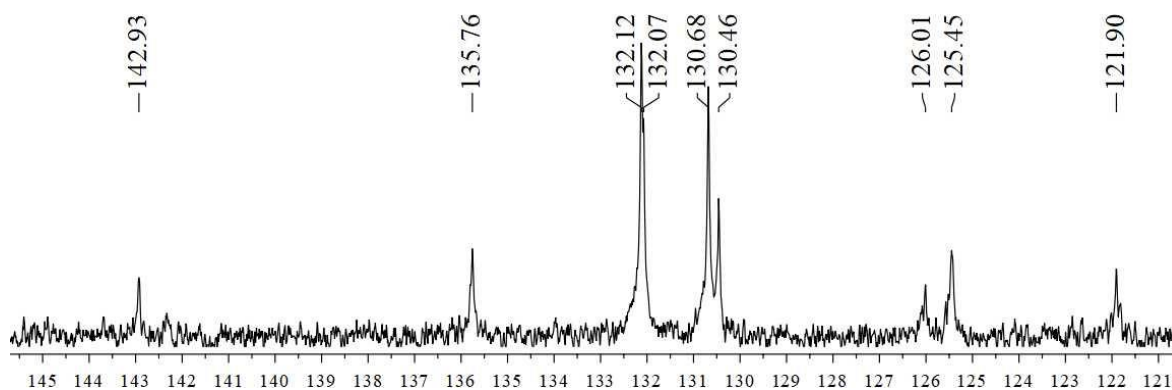

Expanded <sup>13</sup>C NMR spectrum of 2,4,6-tris((1-(4-bromobenzyl)-1H-1,2,3-triazol-4-yl)methoxy)-3,5-dichloropyridine **5e**

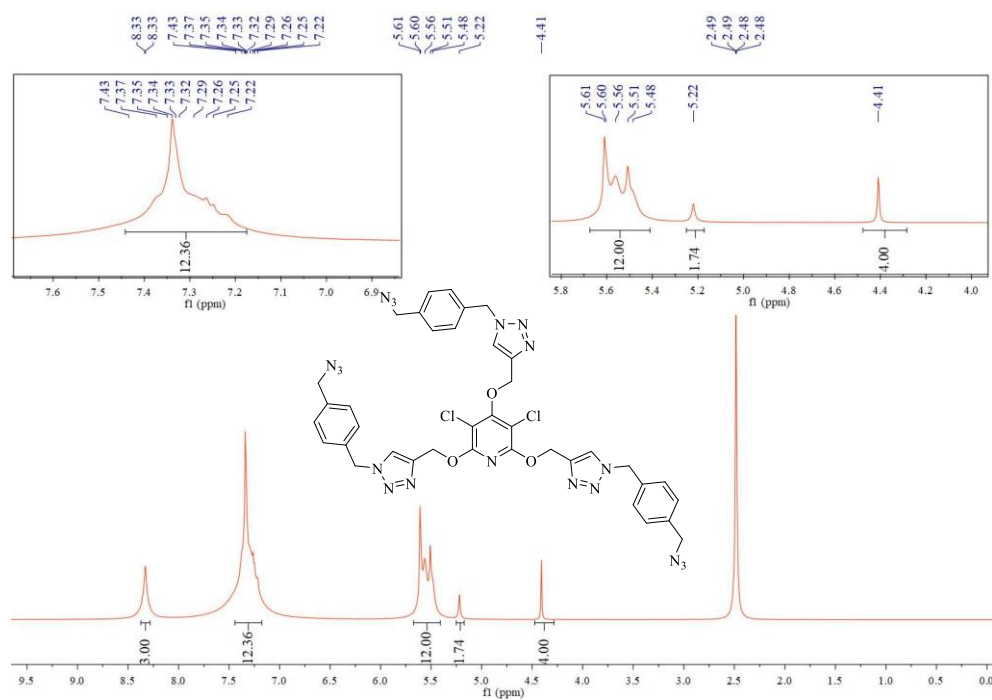

<sup>1</sup>H NMR spectrum of 2,4,6-tris((1-(4-(azidomethyl)benzyl)-1H-1,2,3-triazol-4-yl)methoxy)-3,5-dichloropyridine **5f**

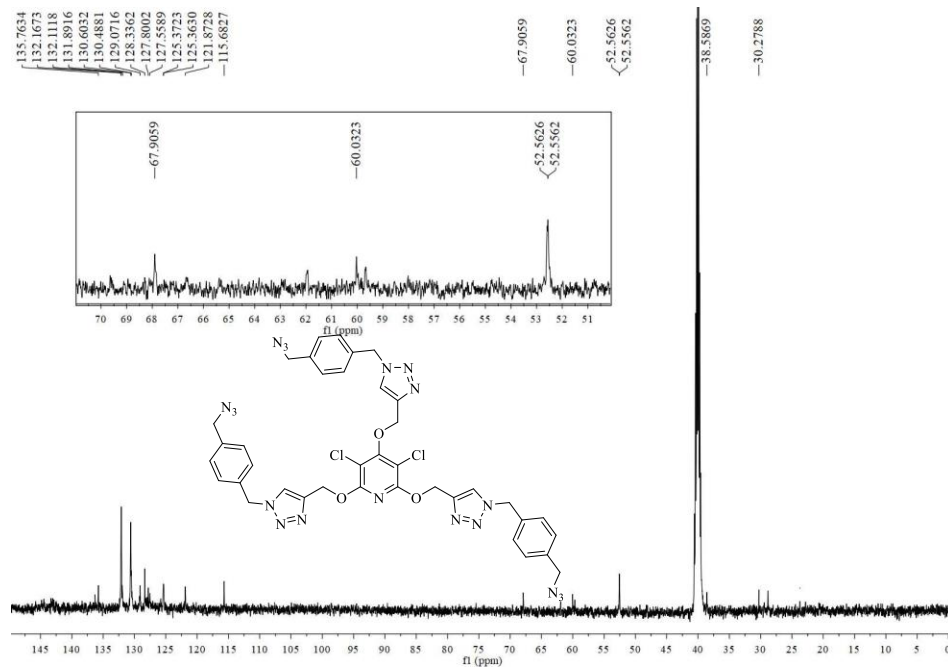

<sup>13</sup>C NMR spectrum of 2,4,6-tris((1-(4-(azidomethyl)benzyl)-1H-1,2,3-triazol-4-yl)methoxy)-3,5-dichloropyridine **5f**

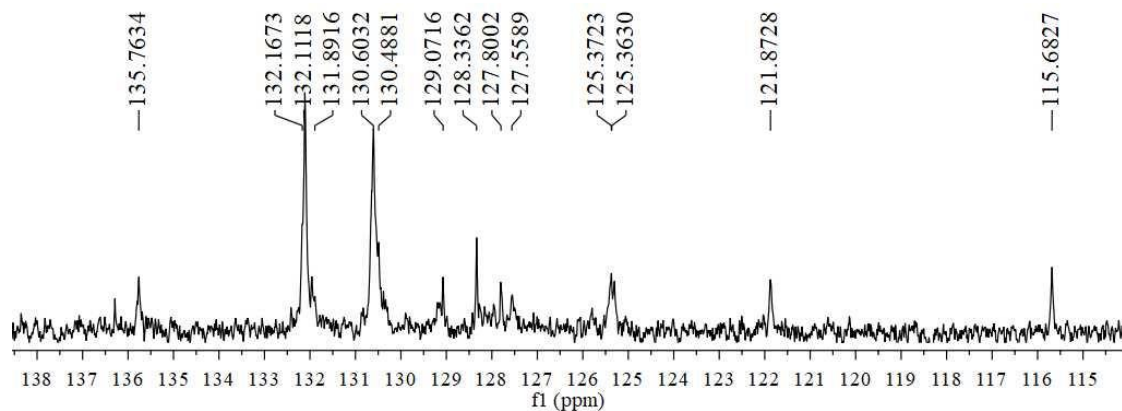

Expanded  $^{13}\text{C}$  NMR spectrum of 2,4,6-tris((1-(4-(azidomethyl)benzyl)-1H-1,2,3-triazol-4-yl)methoxy)-3,5-dichloropyridine **5f**

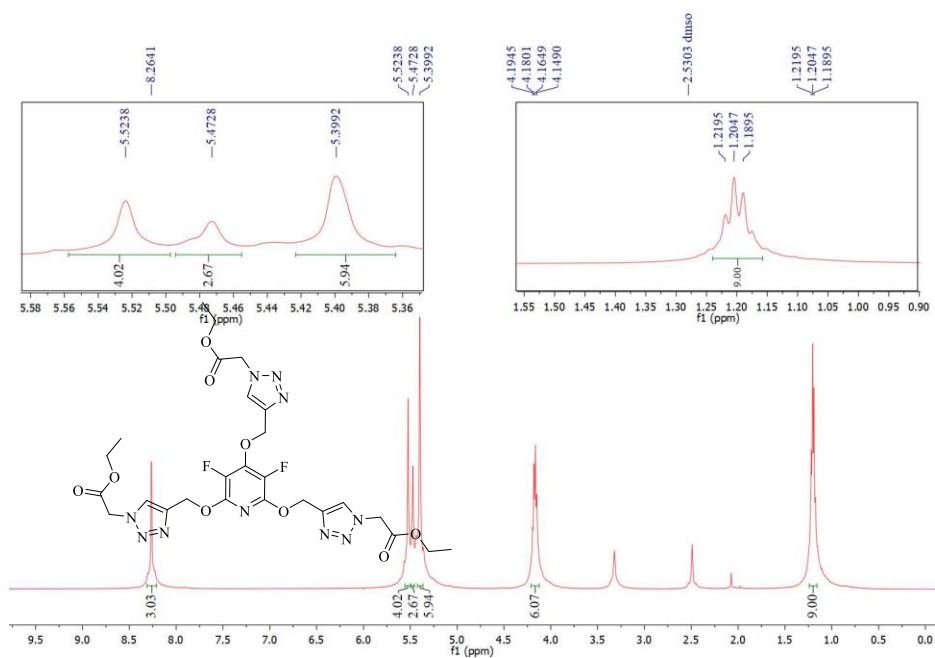

$^1\text{H}$  NMR spectrum of triethyl 2,2',2''-(((3,5-difluoropyridine-2,4,6-triyl)tris(oxy))tris(methylene))tris(1H-1,2,3-triazole-4,1-diyl))triacetate **7a**



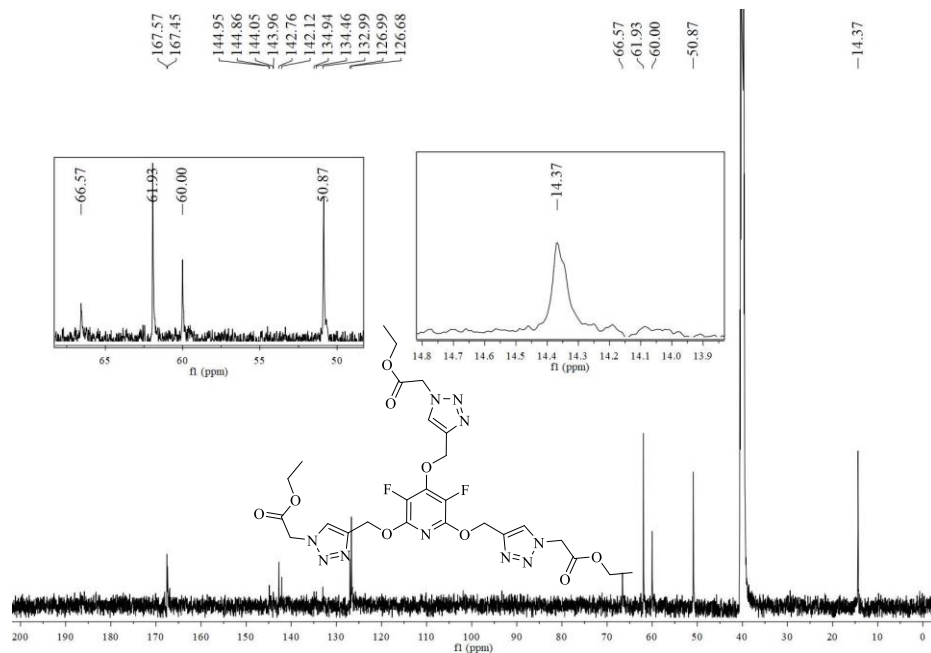

<sup>13</sup>C NMR spectrum of triethyl 2,2',2''-(((3,5-difluoropyridine-2,4,6-triyl)tris(oxy))tris(methylene))tris(1H-1,2,3-triazole-4,1-diyl))triacetate **7a**

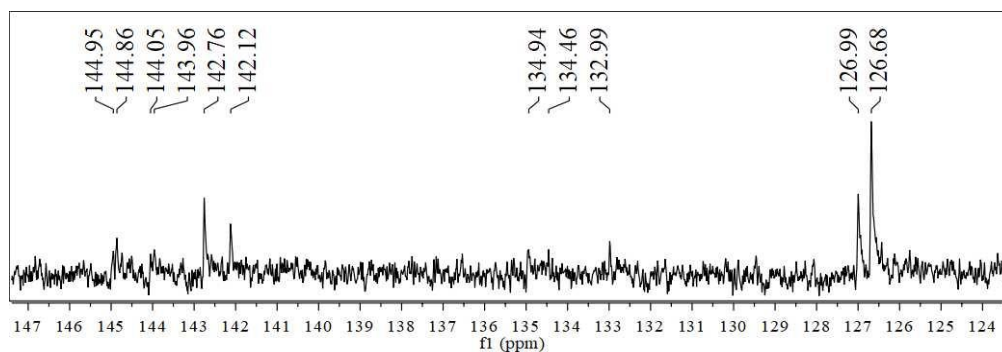

Expanded <sup>13</sup>C NMR spectrum of triethyl 2,2',2''-(((3,5-difluoropyridine-2,4,6-triyl)tris(oxy))tris(methylene))tris(1H-1,2,3-triazole-4,1-diyl))triacetate **7a**

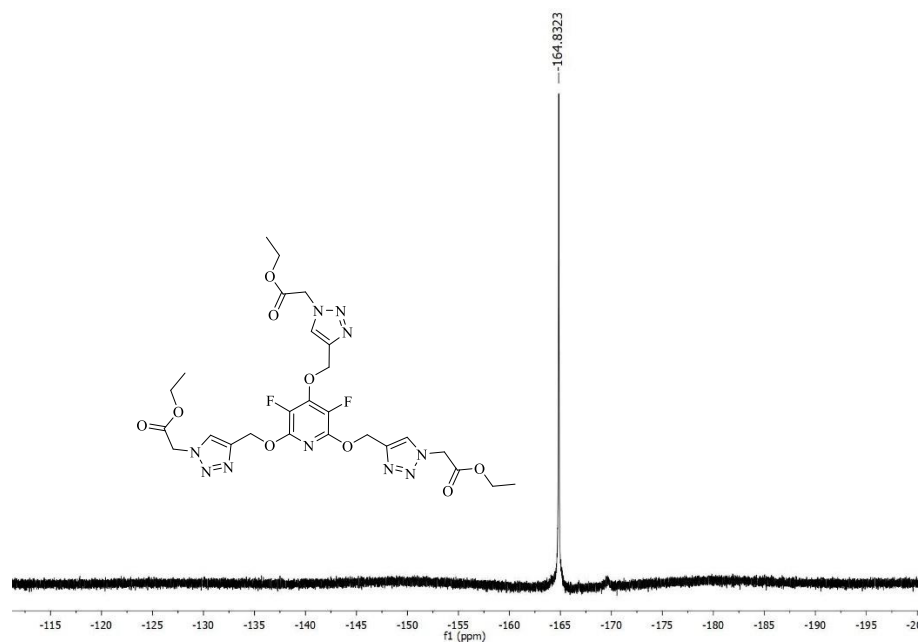

$^{19}\text{F}$  NMR spectrum of triethyl 2,2',2''-(((3,5-difluoropyridine-2,4,6-triyl)tris(oxy))tris(methylene))tris(1H-1,2,3-triazole-4,1-diyl))triacetate **7a**

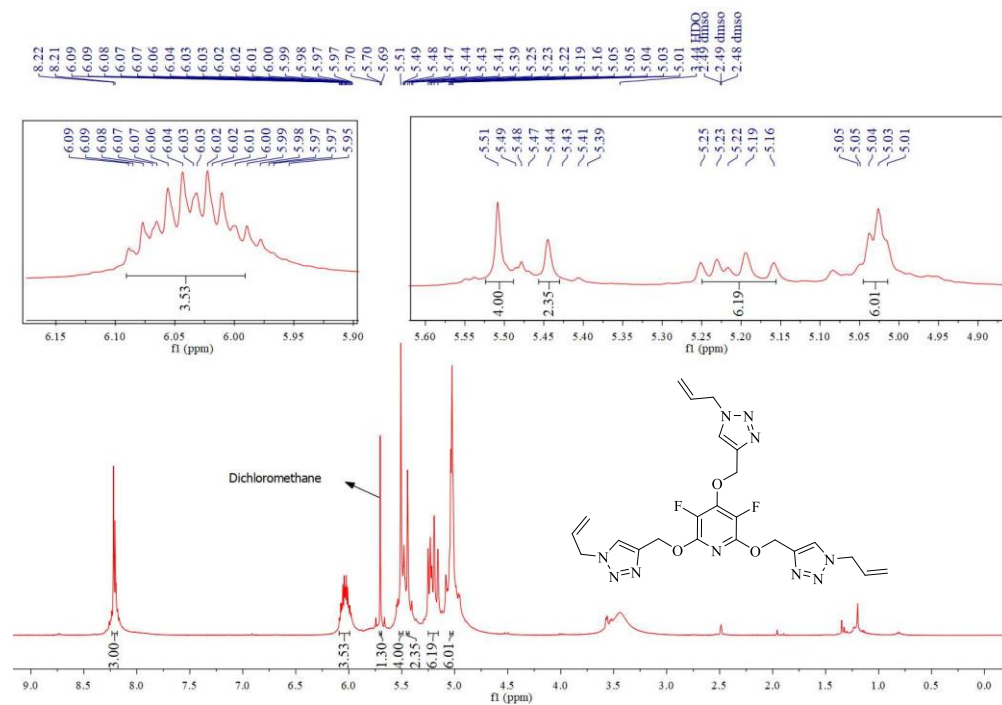

$^1\text{H}$  NMR spectrum of 2,4,6-tris((1-allyl-1H-1,2,3-triazol-4-yl)methoxy)-3,5-difluoropyridine **7b**

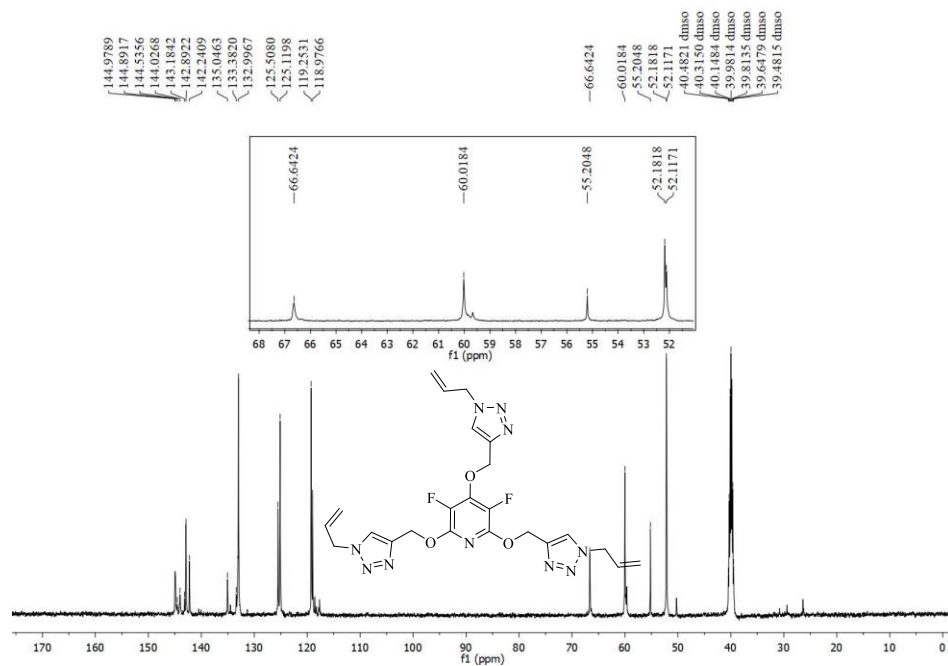

<sup>13</sup>C NMR spectrum of 2,4,6-tris((1-allyl-1H-1,2,3-triazol-4-yl)methoxy)-3,5-difluoropyridine **7b**

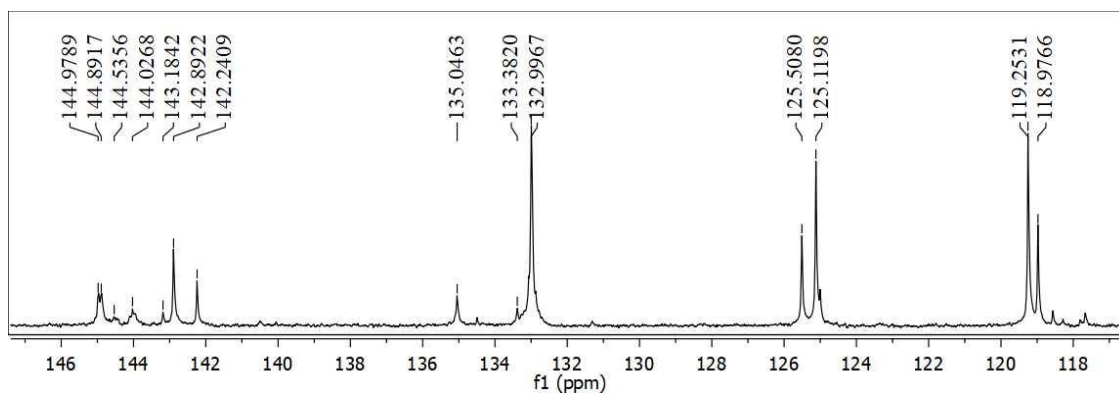

Expanded <sup>13</sup>C NMR spectrum of 2,4,6-tris((1-allyl-1H-1,2,3-triazol-4-yl)methoxy)-3,5-difluoropyridine **7b**

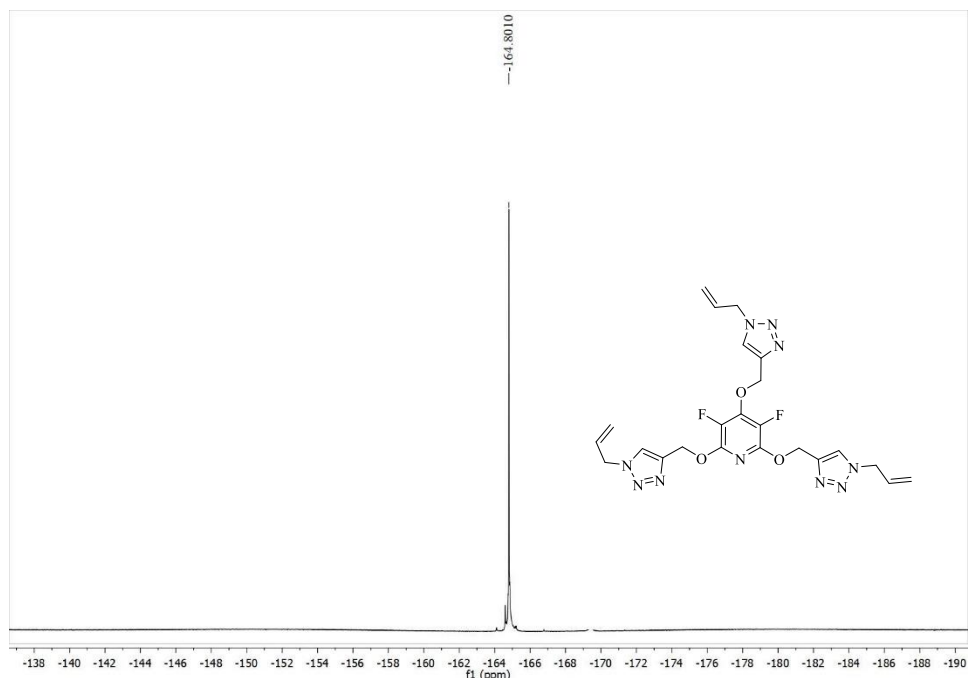

<sup>19</sup>F NMR spectrum of 2,4,6-tris((1-allyl-1H-1,2,3-triazol-4-yl)methoxy)-3,5-difluoropyridine **7b**

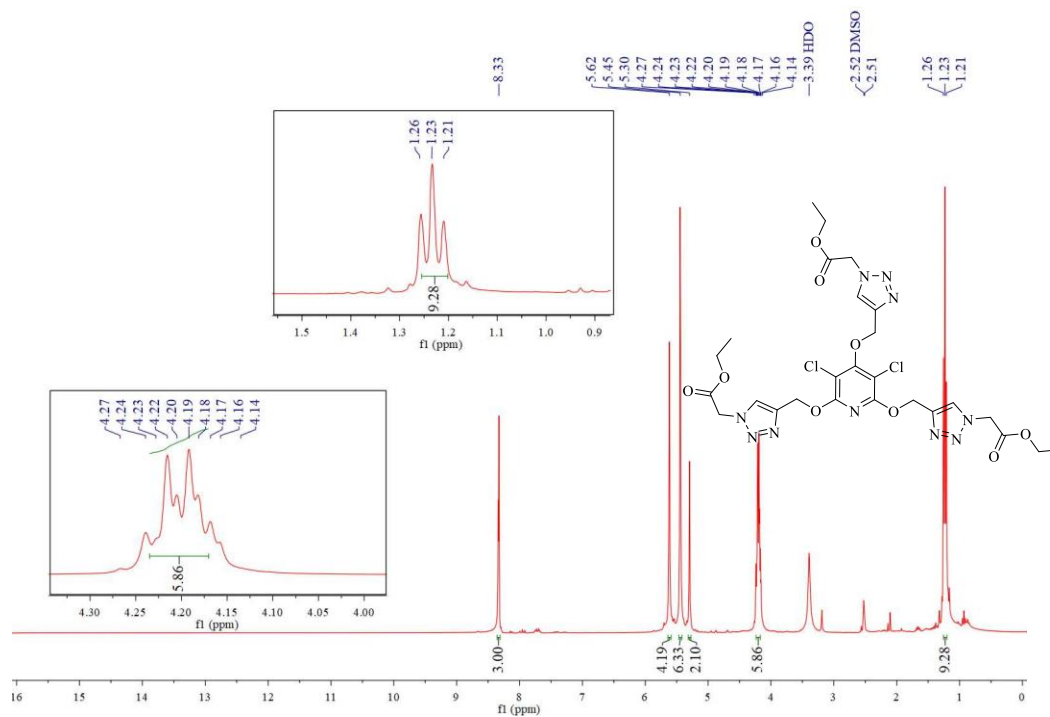

<sup>1</sup>H NMR spectrum of triethyl 2,2',2''-(((3,5-dichloropyridine-2,4,6-triyl)tris(oxy))tris(methylene))tris(1H-1,2,3-triazole-4,1-diyl))triacetate **7c**

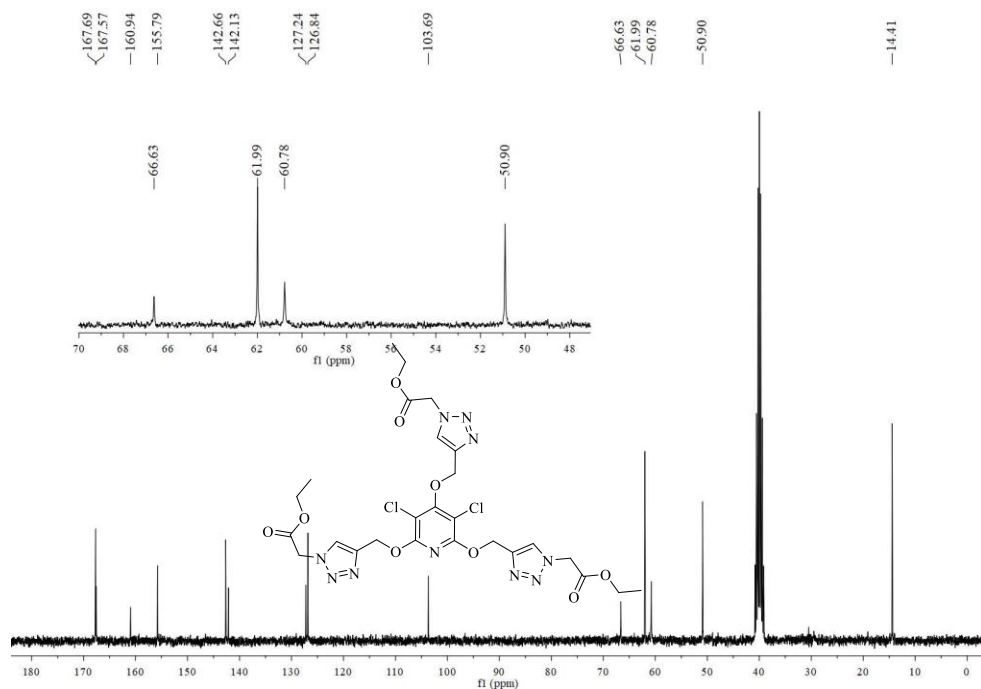

$^{13}\text{C}$  NMR spectrum of triethyl 2,2',2''-(((3,5-dichloropyridine-2,4,6-triyl)tris(oxy))tris(methylene))tris(1H-1,2,3-triazole-4,1-diyl)triacetate **7c**

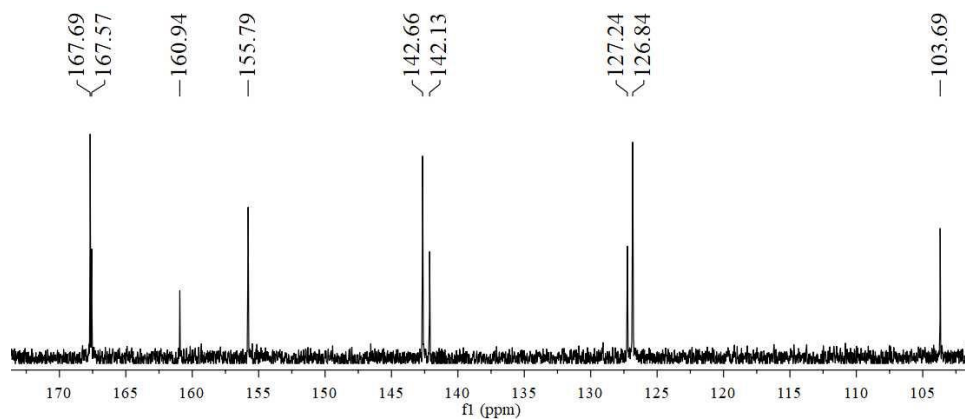

Expanded  $^{13}\text{C}$  NMR spectrum of triethyl 2,2',2''-(((3,5-dichloropyridine-2,4,6-triyl)tris(oxy))tris(methylene))tris(1H-1,2,3-triazole-4,1-diyl)triacetate **7c**

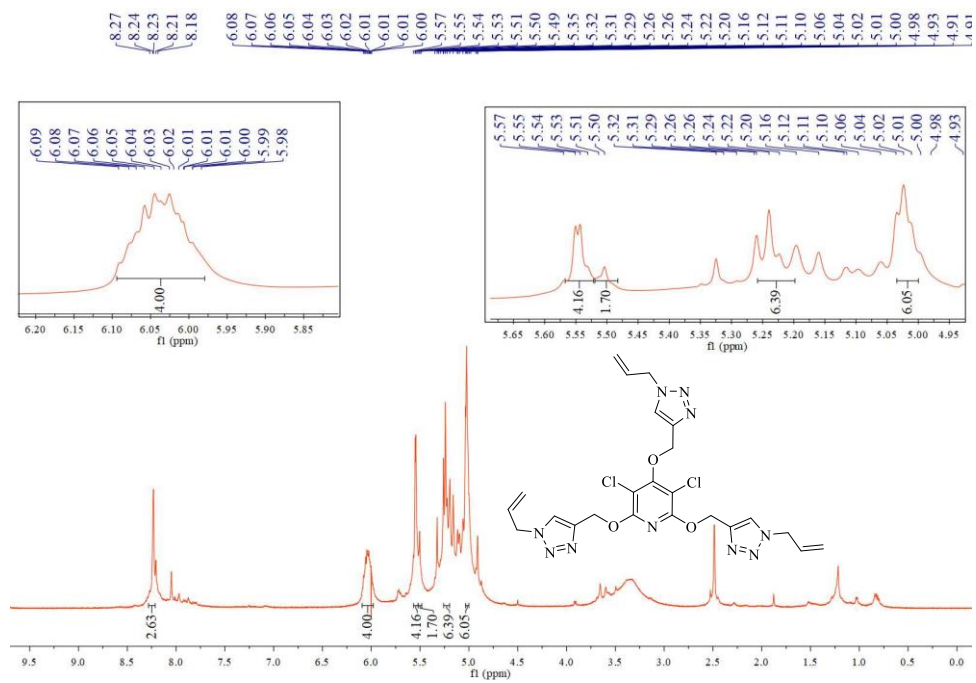

$^1\text{H}$  NMR spectrum of 2,4,6-tris((1-allyl-1H-1,2,3-triazol-4-yl)methoxy)-3,5-difluoropyridine **7d**

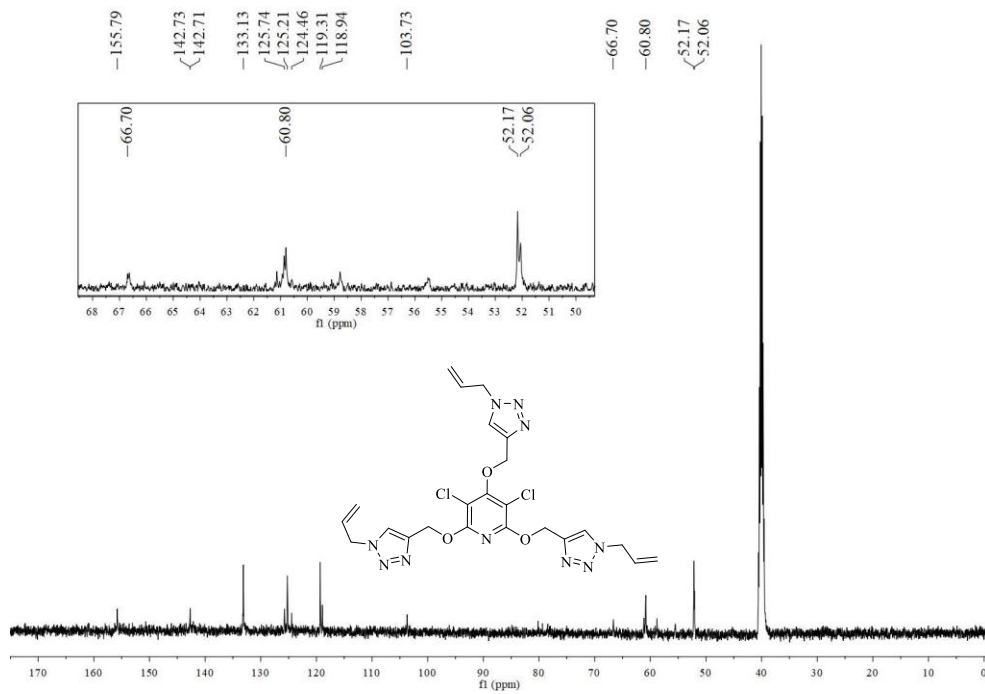

$^{13}\text{C}$  NMR spectrum of 2,4,6-tris((1-allyl-1H-1,2,3-triazol-4-yl)methoxy)-3,5-difluoropyridine **7d**

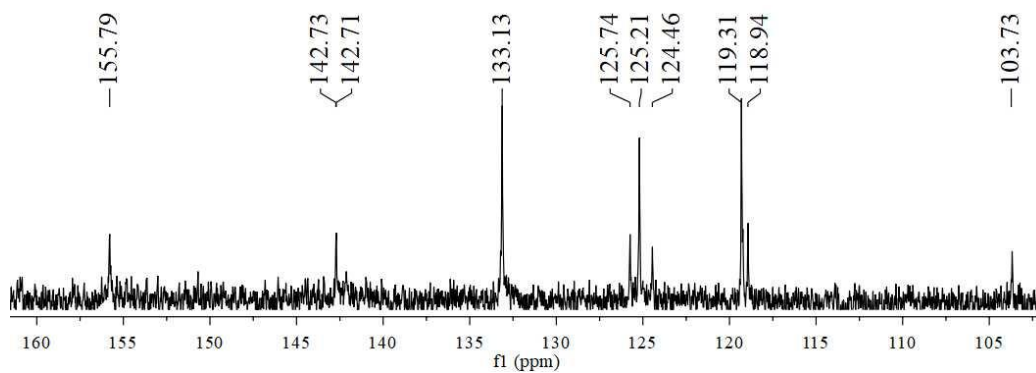

Expanded  $^{13}\text{C}$  NMR spectrum of 2,4,6-tris((1-allyl-1H-1,2,3-triazol-4-yl)methoxy)-3,5-difluoropyridine **7d**

7. NMR spectra of 2-((1-benzyl-1H-1,2,3-triazol-4-yl)methoxy)-3,4,5,6-tetrachloropyridine derivatives **8a-c**

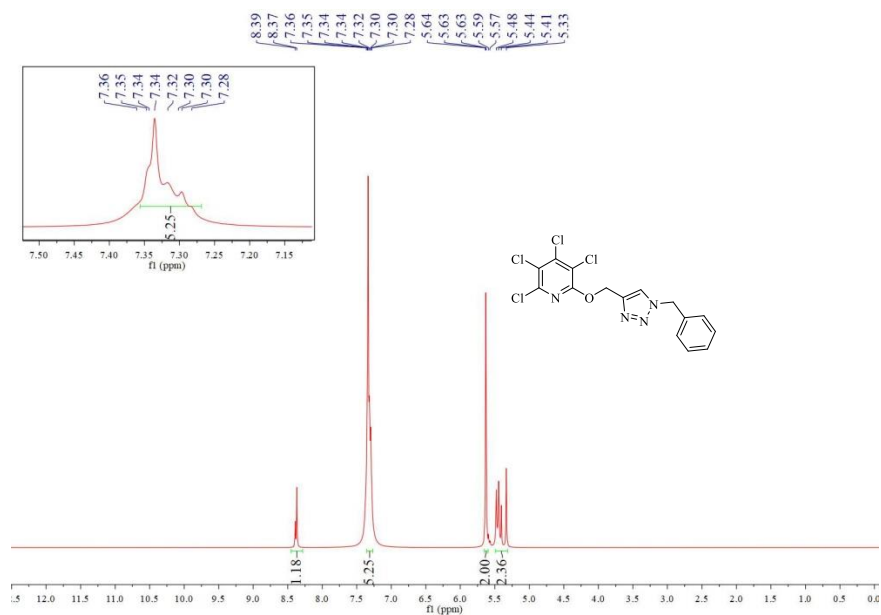

$^1\text{H}$  NMR spectrum of 2-((1-benzyl-1H-1,2,3-triazol-4-yl)methoxy)-3,4,5,6-tetrachloropyridine **8a**

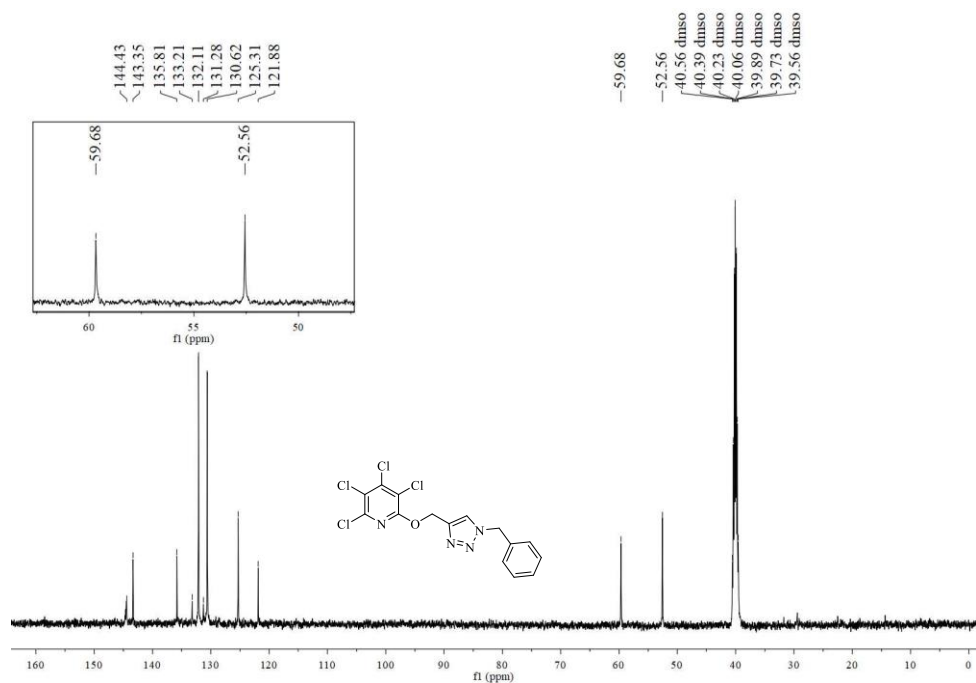

<sup>13</sup>C NMR spectrum of 2-((1-benzyl-1H-1,2,3-triazol-4-yl)methoxy)-3,4,5,6-tetrachloropyridine **8a**

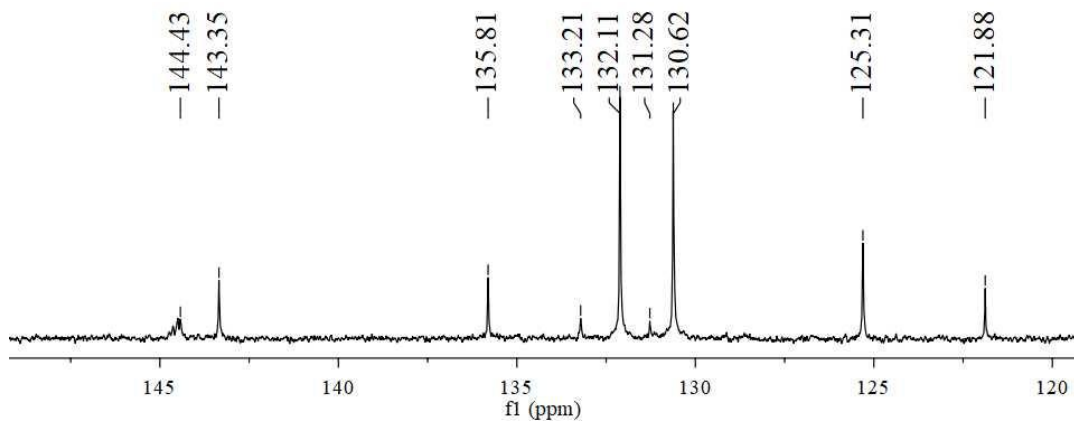

Expanded <sup>13</sup>C NMR spectrum of 2-((1-benzyl-1H-1,2,3-triazol-4-yl)methoxy)-3,4,5,6-tetrachloropyridine **8a**



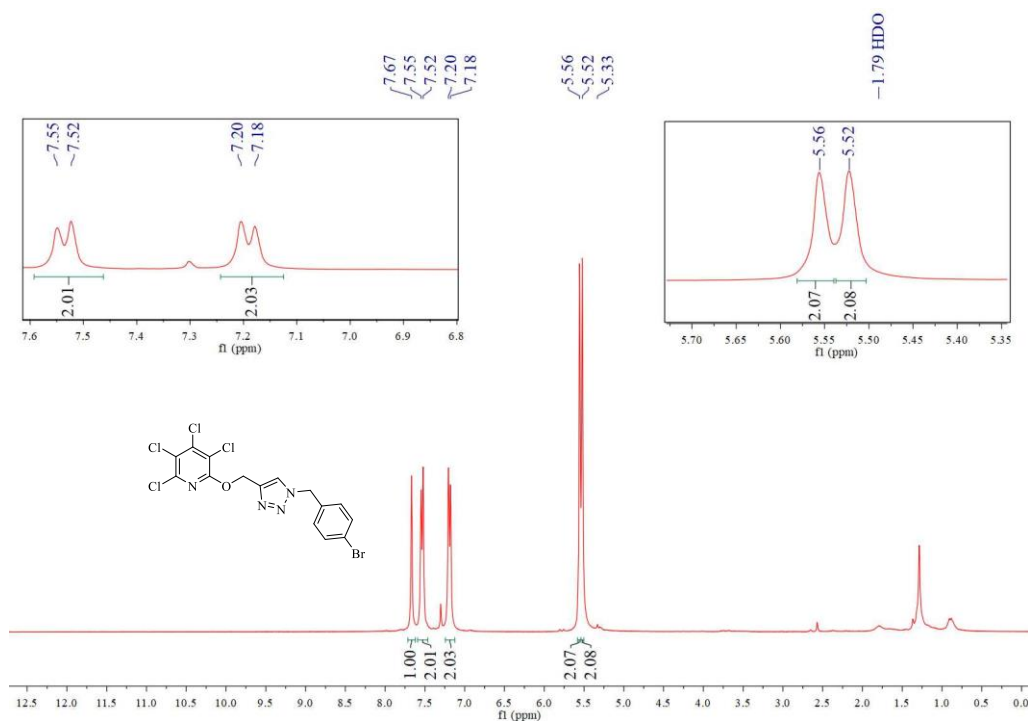

<sup>1</sup>H NMR spectrum of 2-((1-(4-bromobenzyl)-1H-1,2,3-triazol-4-yl)methoxy)-3,4,5,6-tetrachloropyridine **8b**

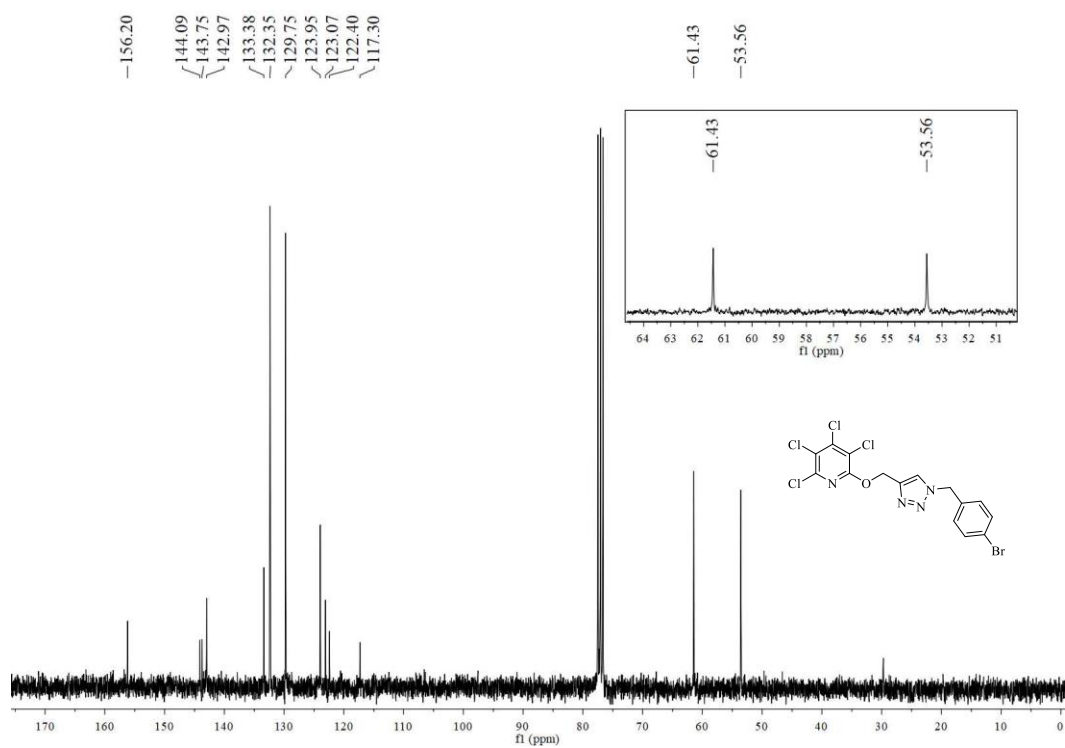

<sup>13</sup>C NMR spectrum of 2-((1-(4-bromobenzyl)-1H-1,2,3-triazol-4-yl)methoxy)-3,4,5,6-tetrachloropyridine **8b**

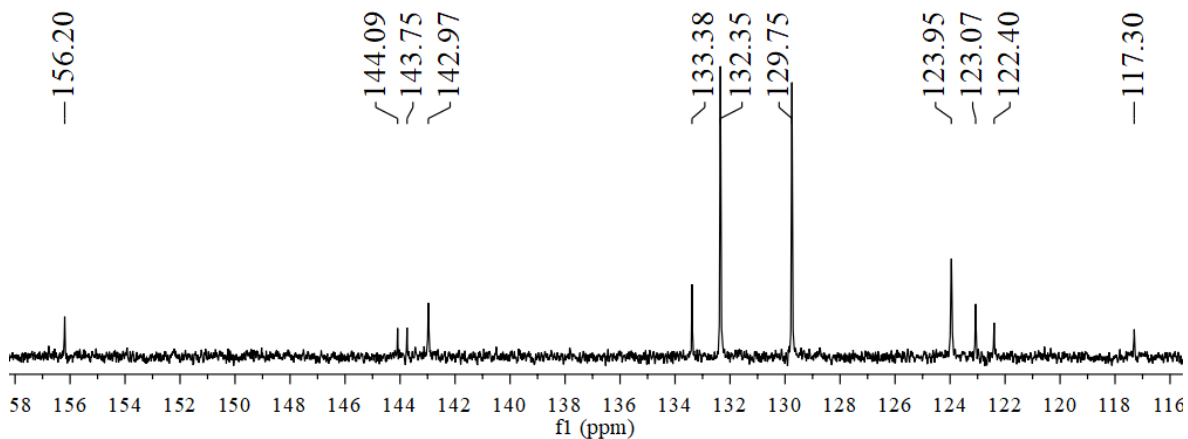

Expanded  $^{13}\text{C}$  NMR spectrum of 2-((1-(4-bromobenzyl)-1H-1,2,3-triazol-4-yl)methoxy)-3,4,5,6-tetrachloropyridine **8b**

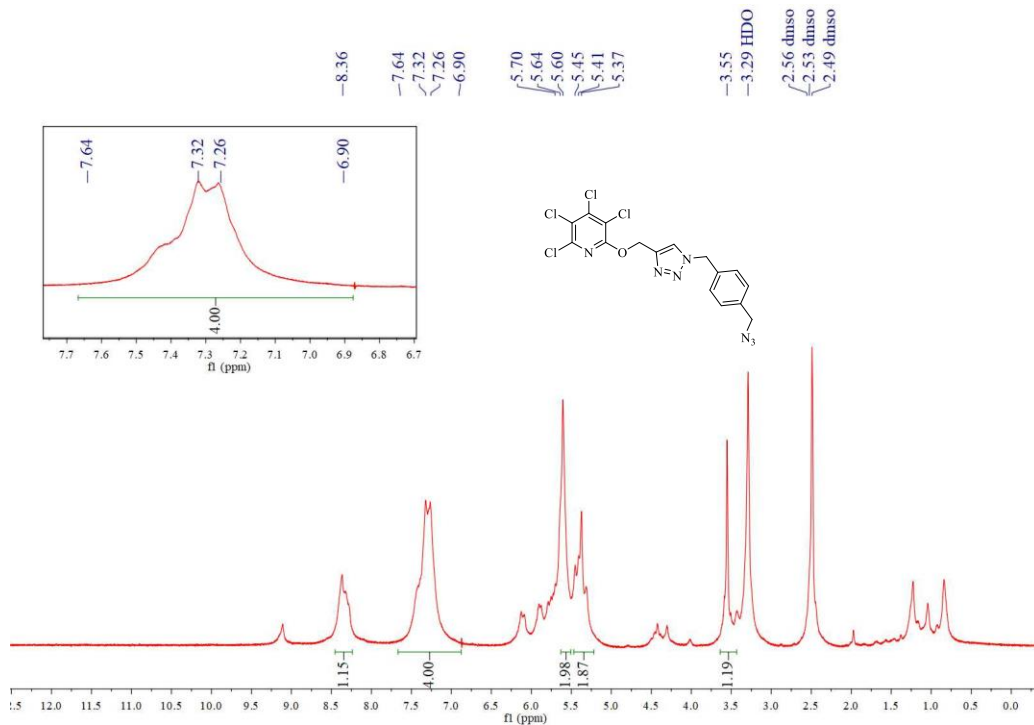

$^1\text{H}$  NMR spectrum of 2-((1-(4-bromobenzyl)-1H-1,2,3-triazol-4-yl)methoxy)-3,4,5,6-tetrachloropyridine **8c**

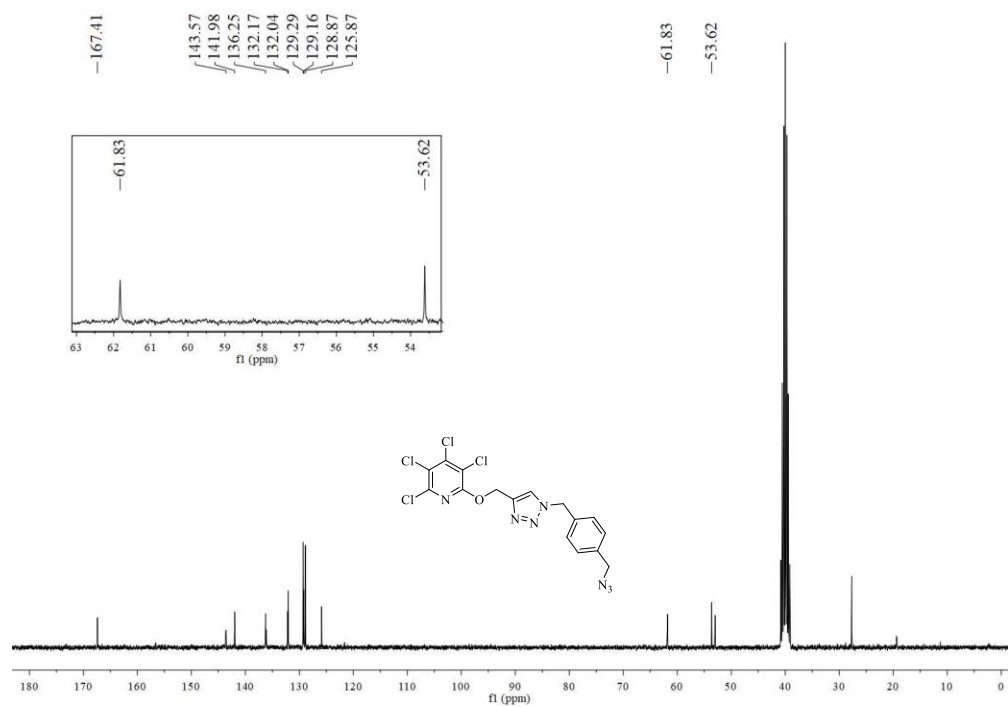

<sup>13</sup>C NMR spectrum of 2-((1-(4-bromobenzyl)-1H-1,2,3-triazol-4-yl)methoxy)-3,4,5,6-tetrachloropyridine **8c**

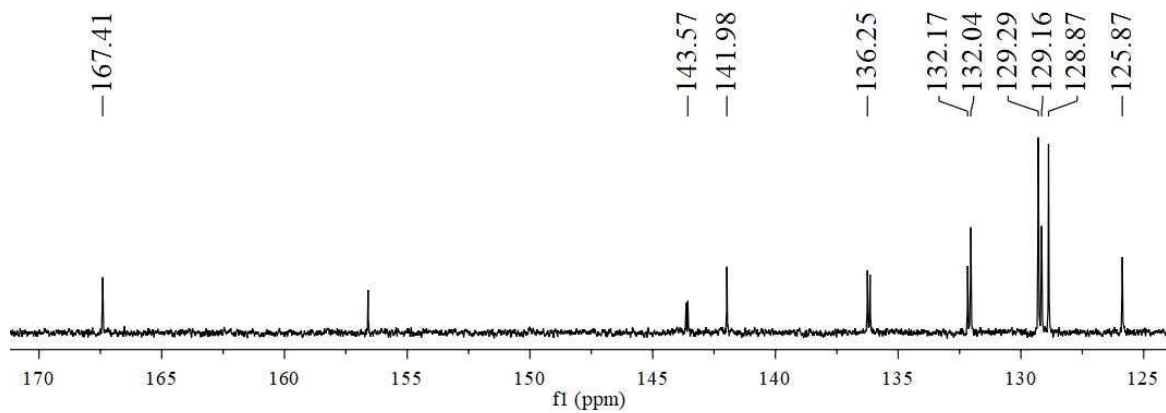

Expanded <sup>13</sup>C NMR spectrum of 2-((1-(4-bromobenzyl)-1H-1,2,3-triazol-4-yl)methoxy)-3,4,5,6-tetrachloropyridine **8c**

## 8. NMR spectra of Suzuki-Miyaura cross-coupling products 10a-f

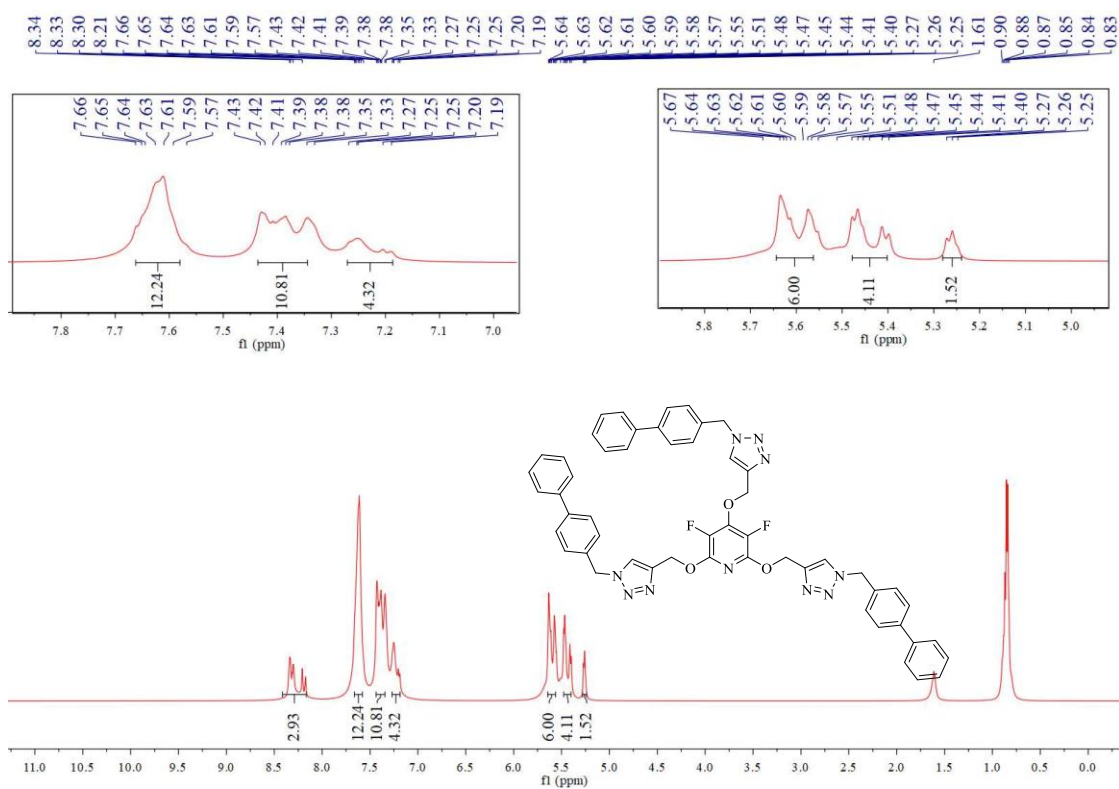

<sup>1</sup>H NMR spectrum of 2,4-tris((1-([1,1'-biphenyl]-4-ylmethyl)-1H-1,2,3-triazol-4-yl)methoxy)-3,5-difluoropyridine **10a**

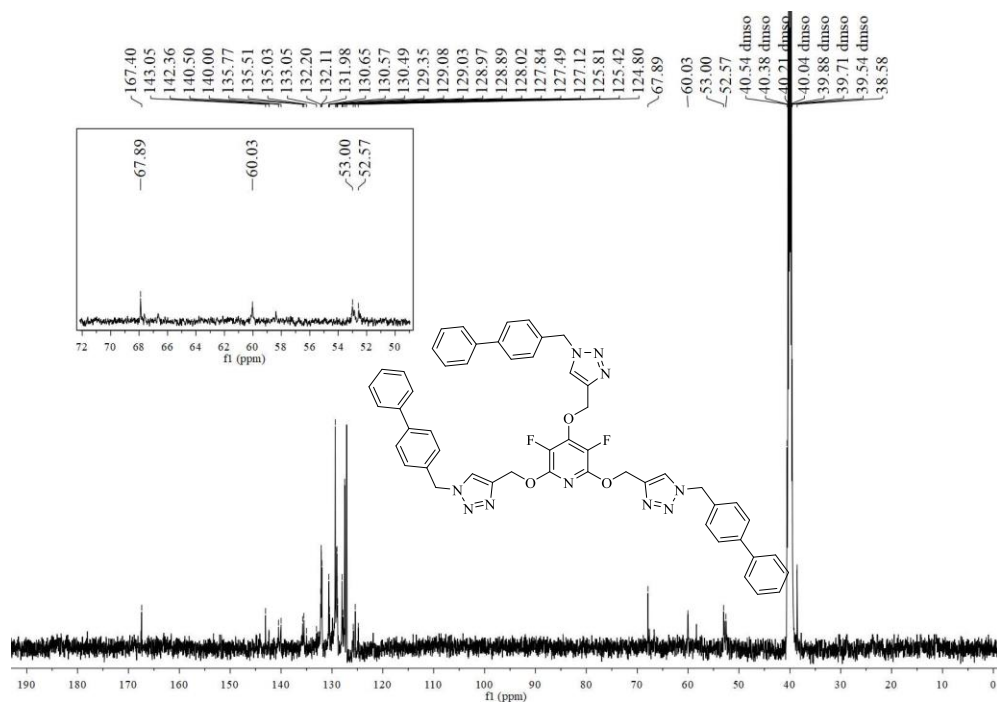

$^{13}\text{C}$  NMR spectrum of 2,4,6-tris((1-([1,1'-biphenyl]-4-ylmethyl)-1H-1,2,3-triazol-4-yl)methoxy)-3,5-difluoropyridine **10a**

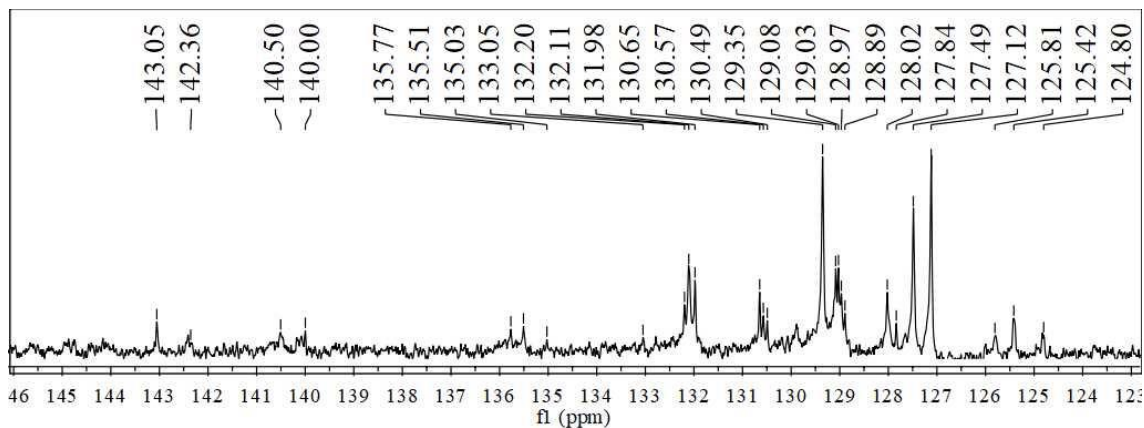

Expanded  $^{13}\text{C}$  NMR spectrum of 2,4,6-tris((1-([1,1'-biphenyl]-4-ylmethyl)-1H-1,2,3-triazol-4-yl)methoxy)-3,5-difluoropyridine **10a**

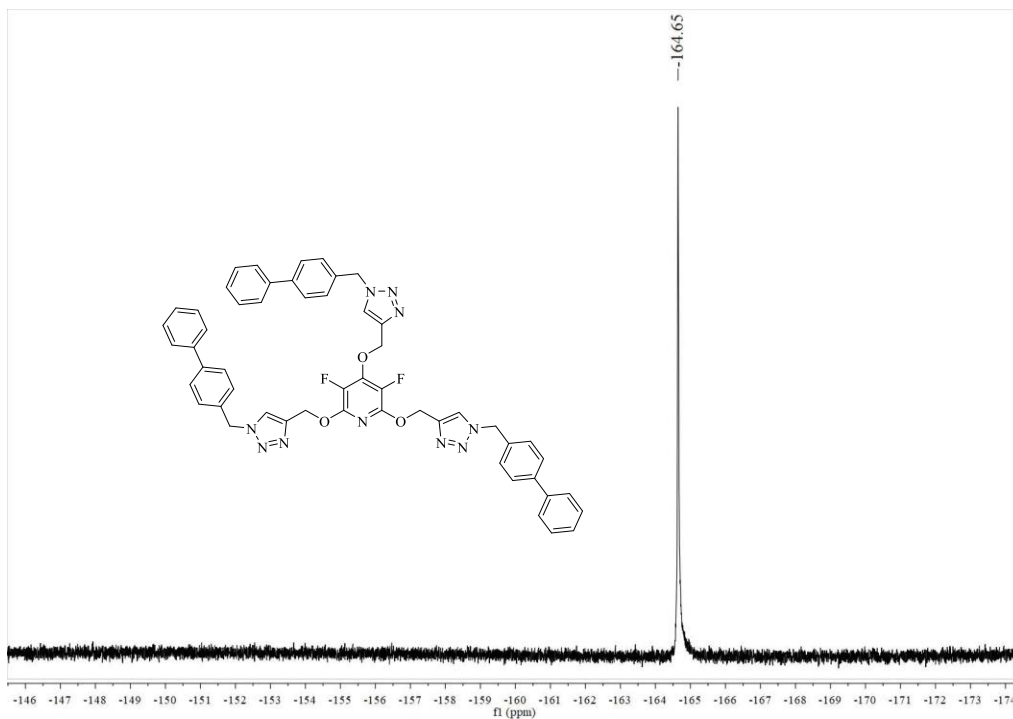

$^{19}\text{F}$  NMR spectrum of 2,4,6-tris((1-([1,1'-biphenyl]-4-ylmethyl)-1H-1,2,3-triazol-4-yl)methoxy)-3,5-difluoropyridine **10a**

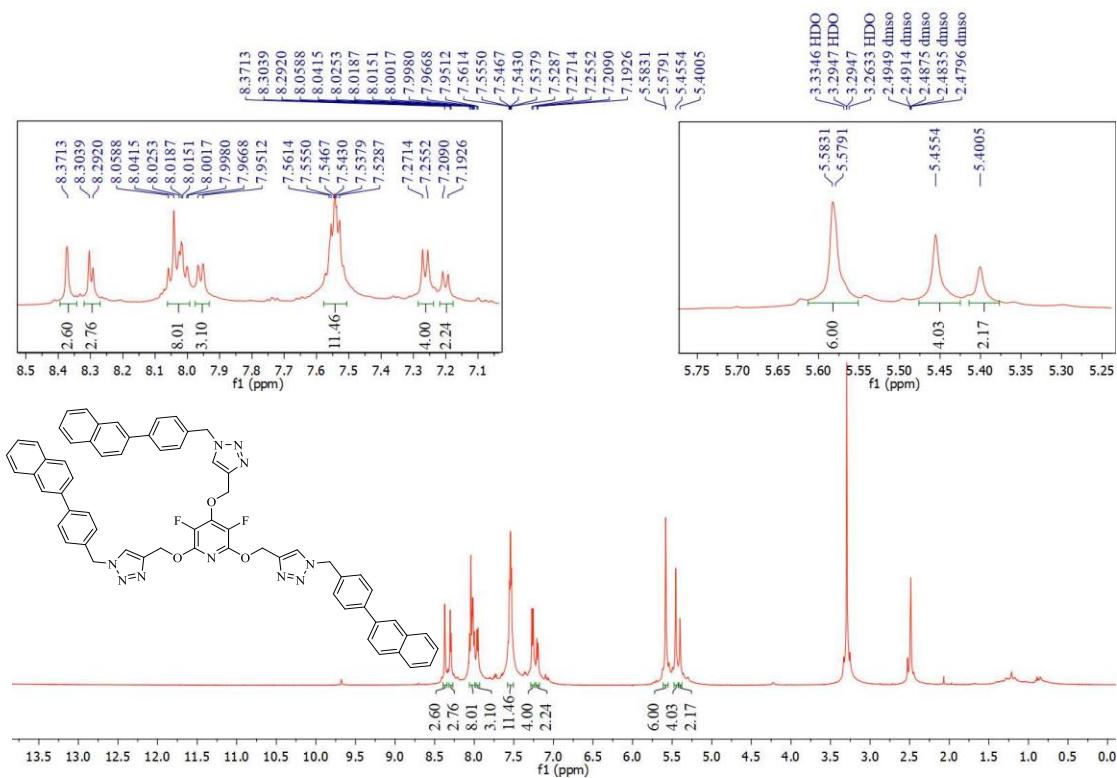

<sup>1</sup>H NMR spectrum of 3,5-difluoro-2,4,6-tris((1-(4-(naphthalen-2-yl)benzyl)-1H-1,2,3-triazol-4-yl)methoxy)pyridine **10b**

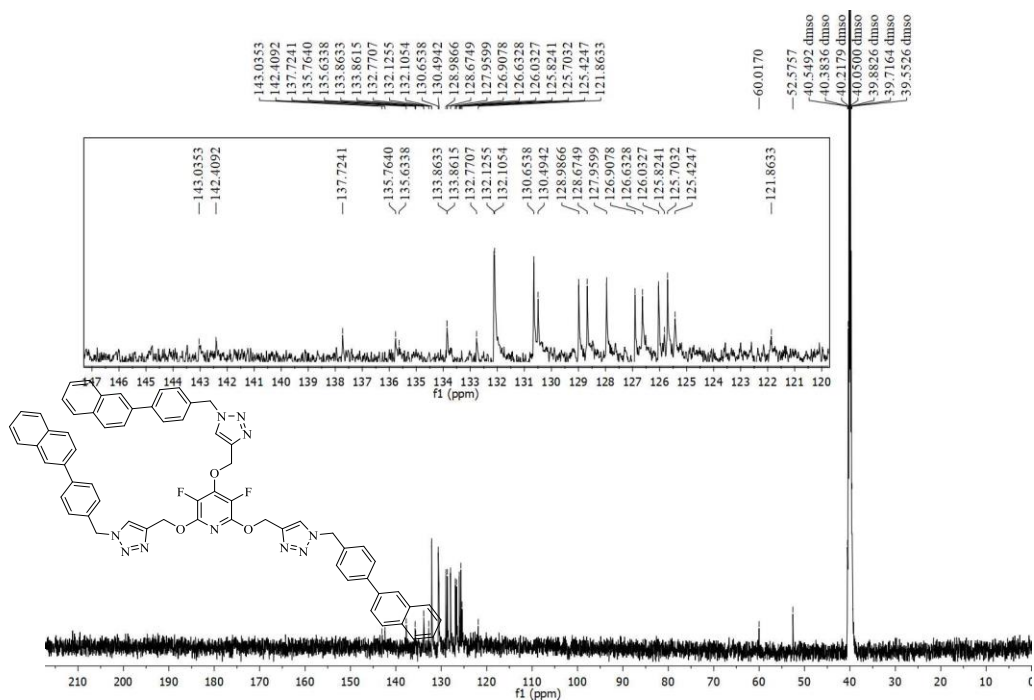

<sup>13</sup>C NMR spectrum of 3,5-difluoro-2,4,6-tris((1-(4-(naphthalen-2-yl)benzyl)-1H-1,2,3-triazol-4-yl)methoxy)pyridine **10b**

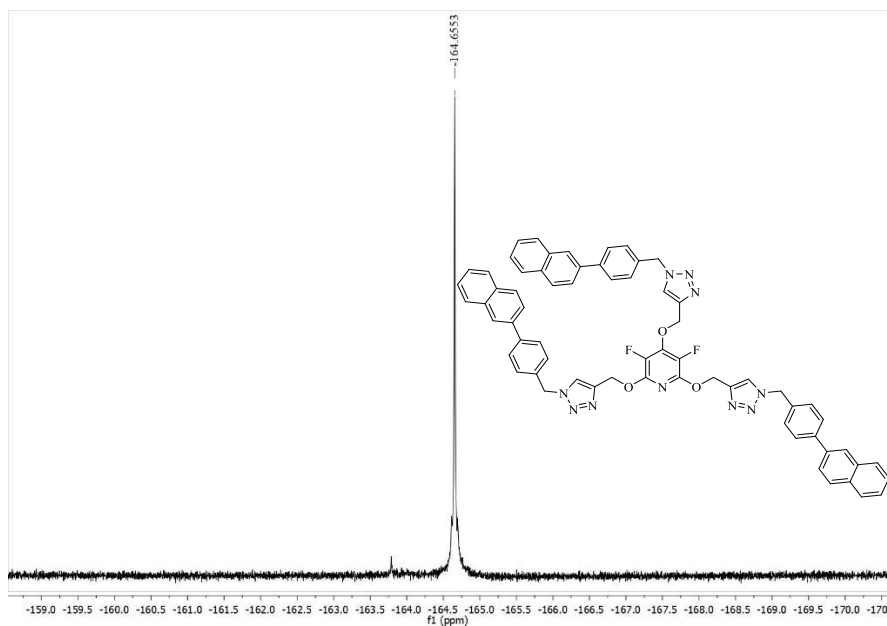

$^{13}\text{C}$  NMR spectrum of 3,5-difluoro-2,4,6-tris((1-(4-(naphthalen-2-yl)benzyl)-1H-1,2,3-triazol-4-yl)methoxy)pyridine **10b**

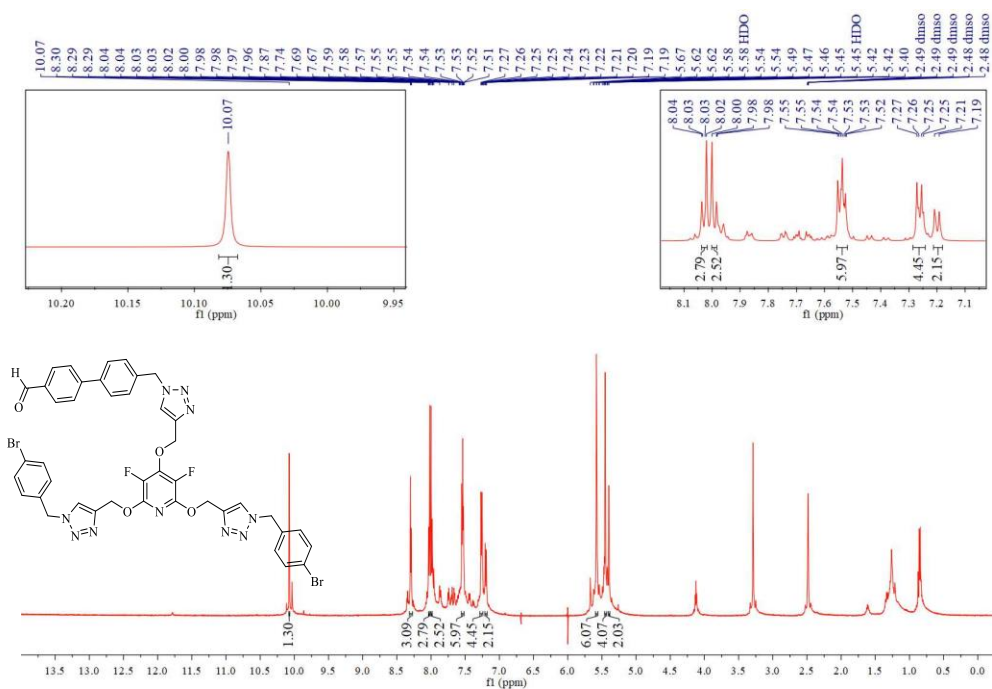

$^1\text{H}$  NMR spectrum of 4'-((4-(((2,6-bis((1-(4-bromobenzyl)-1H-1,2,3-triazol-4-yl)methoxy)-3,5-difluoropyridin-4-yl)oxy)methyl)-1H-1,2,3-triazol-1-yl)methyl)-[1,1'-biphenyl]-4-carbaldehyde **10c**

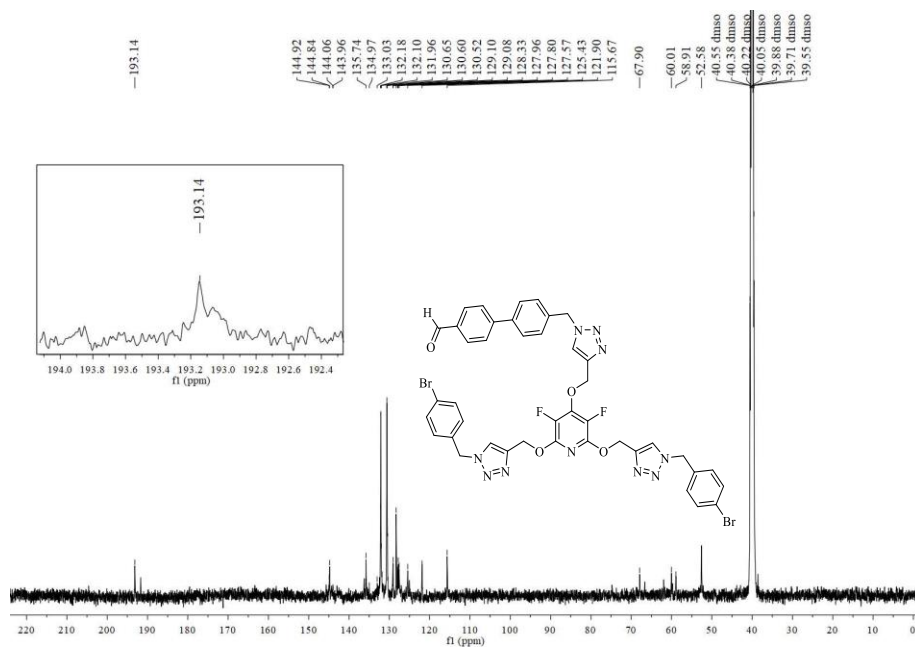

<sup>13</sup>C NMR spectrum of 4'-((4-(((2,6-bis((1-(4-bromobenzyl)-1H-1,2,3-triazol-4-yl)methoxy)-3,5-difluoropyridin-4-yl)oxy)methyl)-1H-1,2,3-triazol-1-yl)methyl)-[1,1'-biphenyl]-4-carbaldehyde) **10c**

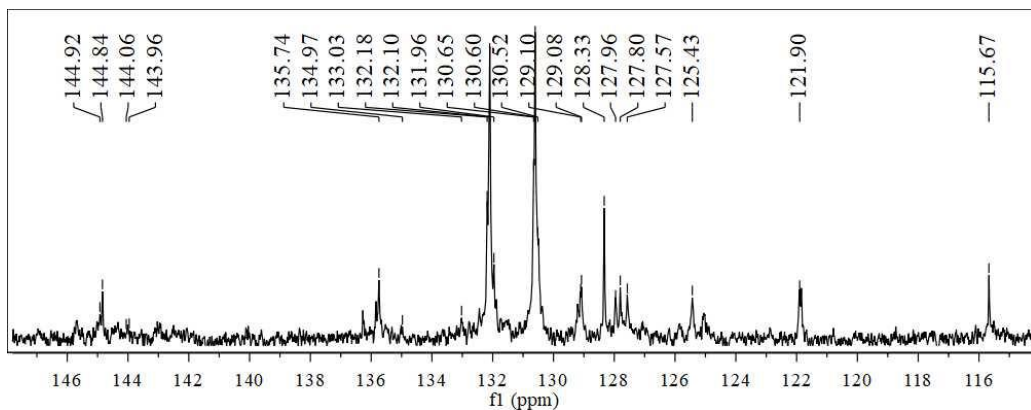

Expanded <sup>13</sup>C NMR spectrum of 4'-((4-(((2,6-bis((1-(4-bromobenzyl)-1H-1,2,3-triazol-4-yl)methoxy)-3,5-difluoropyridin-4-yl)oxy)methyl)-1H-1,2,3-triazol-1-yl)methyl)-[1,1'-biphenyl]-4-carbaldehyde) **10c**



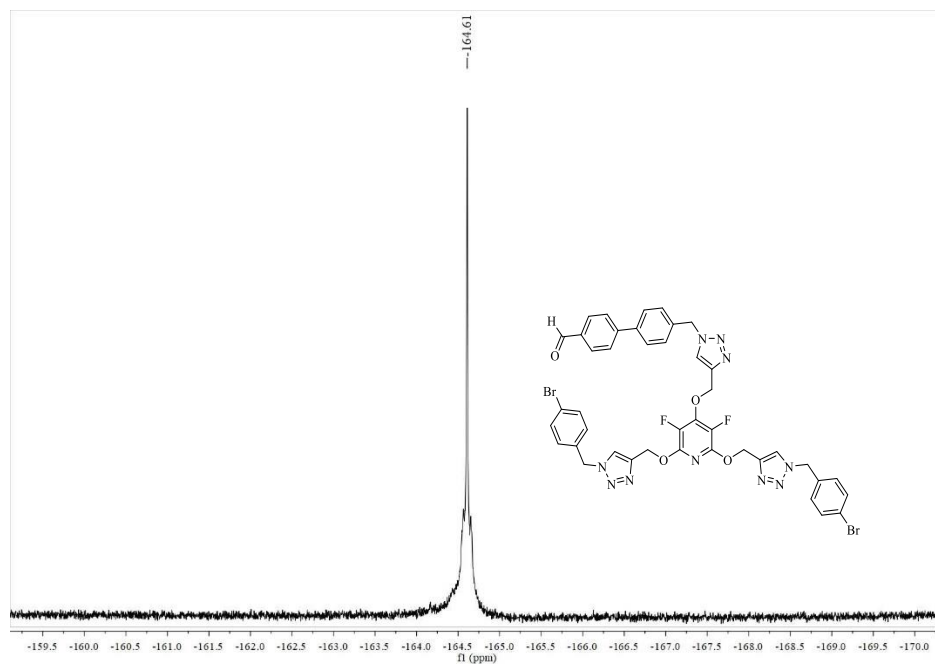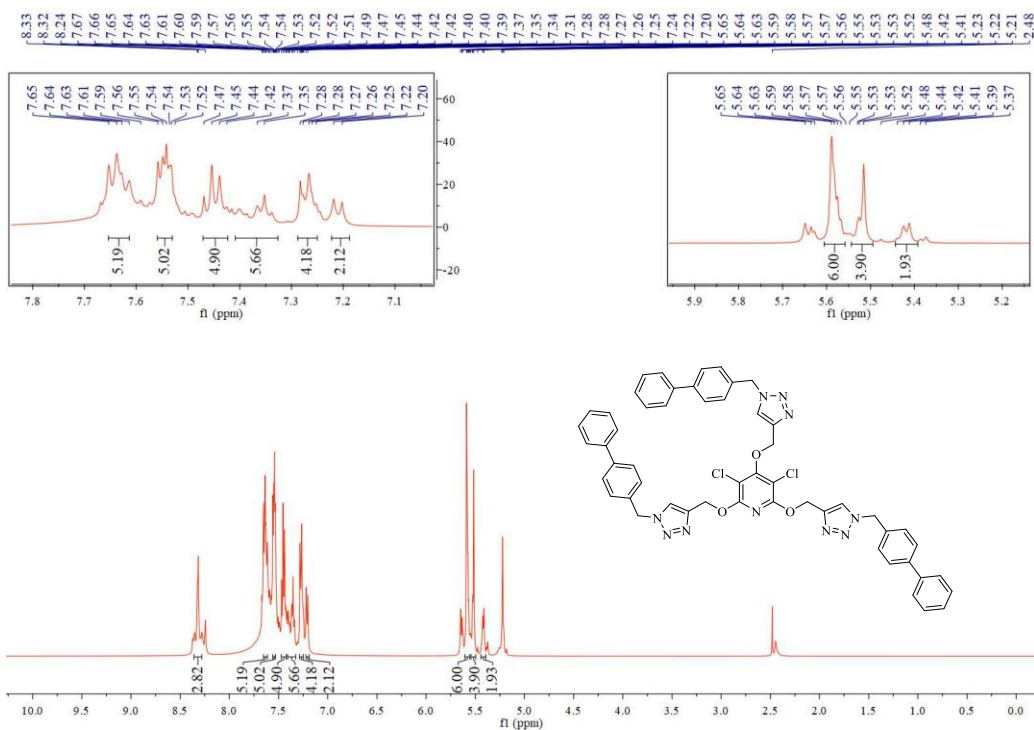

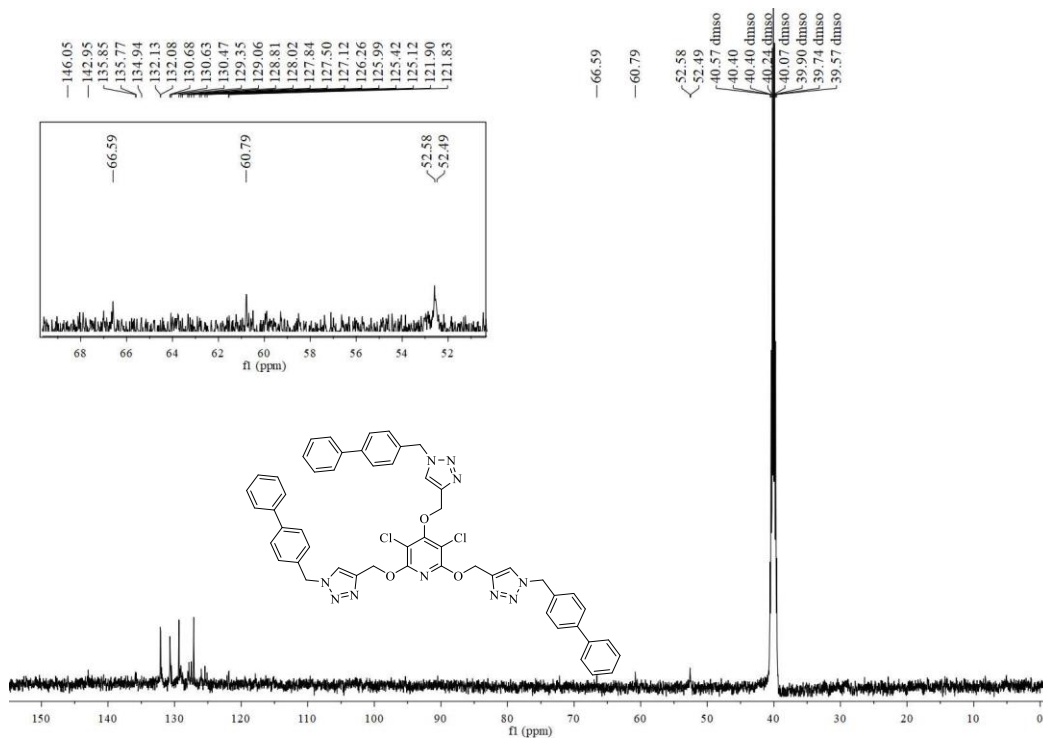

<sup>13</sup>C NMR spectrum of 2,4,6-tris((1-([1,1'-biphenyl]-4-yl)methyl)-1H-1,2,3-triazol-4-yl)methoxy)-3,5-dichloropyridine **10d**

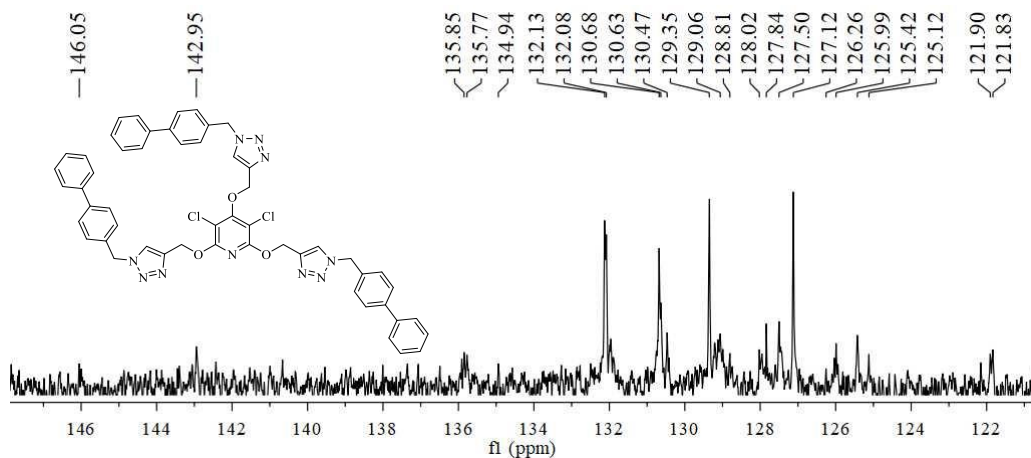

Expanded <sup>13</sup>C NMR spectrum of 2,4,6-tris((1-([1,1'-biphenyl]-4-yl)methyl)-1H-1,2,3-triazol-4-yl)methoxy)-3,5-dichloropyridine **10d**

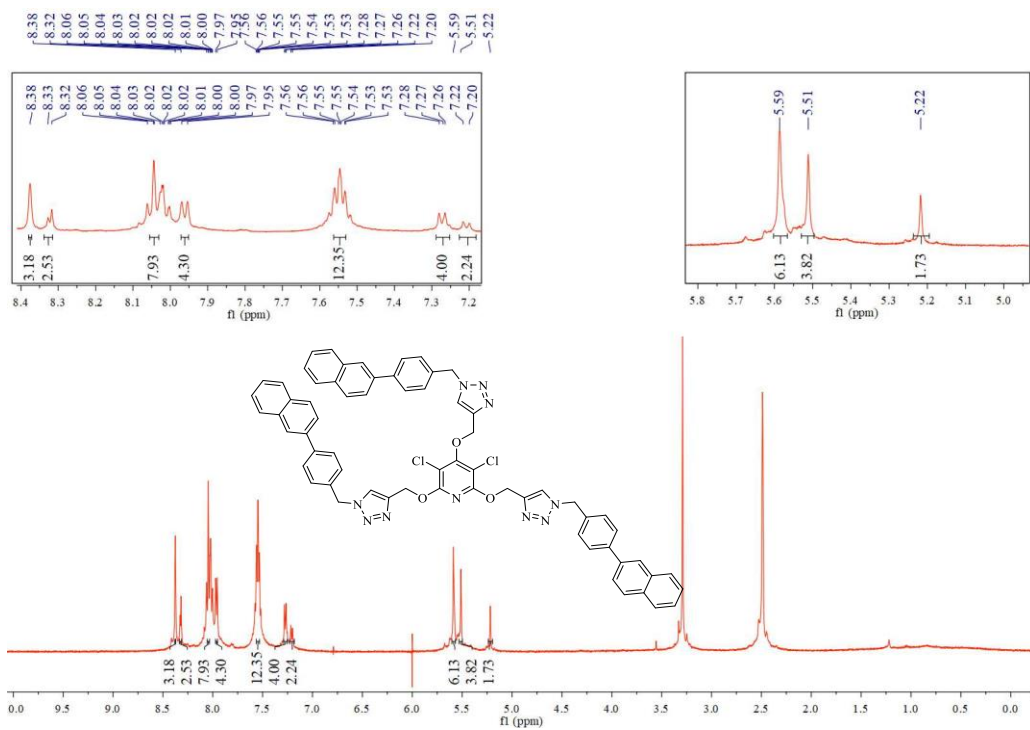

<sup>1</sup>H NMR spectrum of 3,5-dichloro-2,4,6-tris((1-(4-(naphthalen-2-yl)benzyl)-1H-1,2,3-triazol-4-yl)methoxy)pyridine **10e**

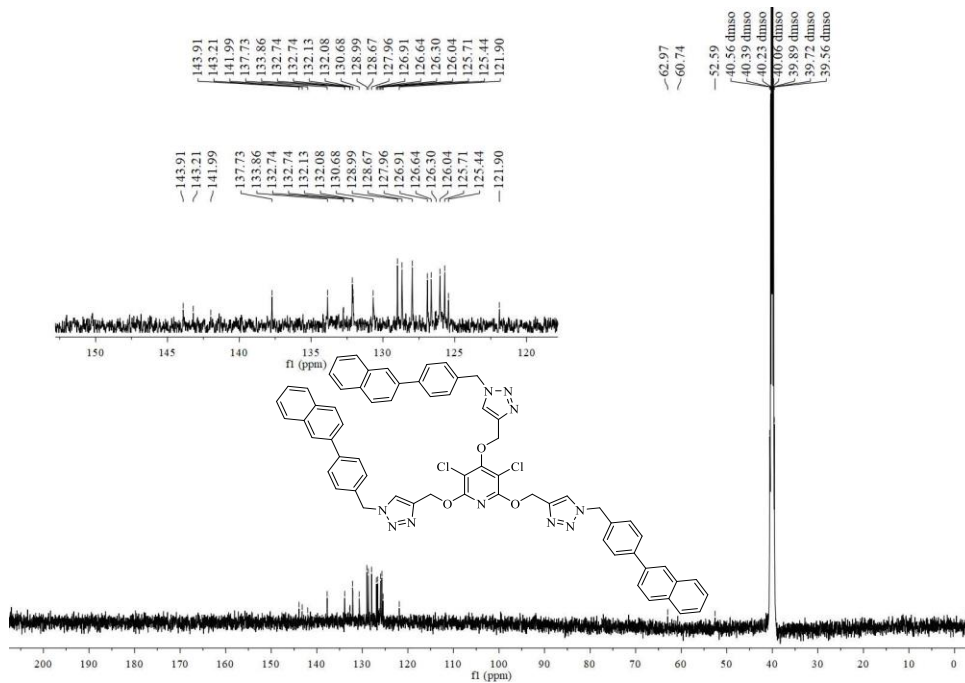

<sup>13</sup>C NMR spectrum of 3,5-dichloro-2,4,6-tris((1-(4-(naphthalen-2-yl)benzyl)-1H-1,2,3-triazol-4-yl)methoxy)pyridine **10e**

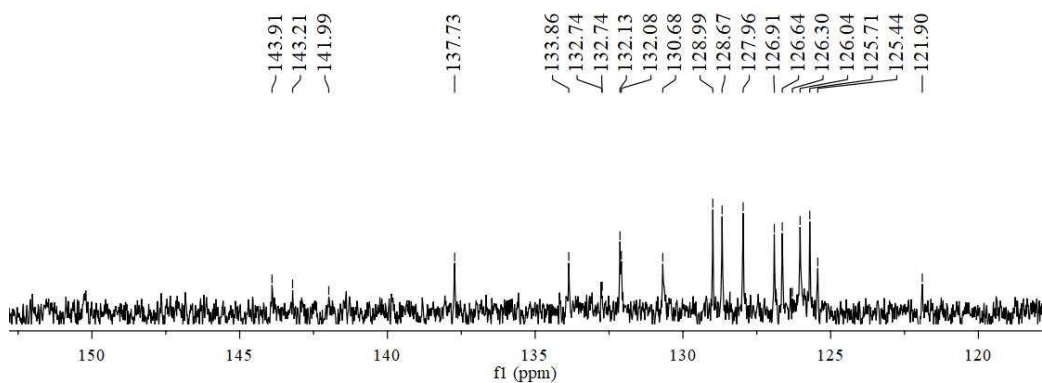

Expanded  $^{13}\text{C}$  NMR spectrum of 3,5-dichloro-2,4,6-tris((1-(4-(naphthalen-2-yl)benzyl)-1H-1,2,3-triazol-4-yl)methoxy)pyridine **10e**

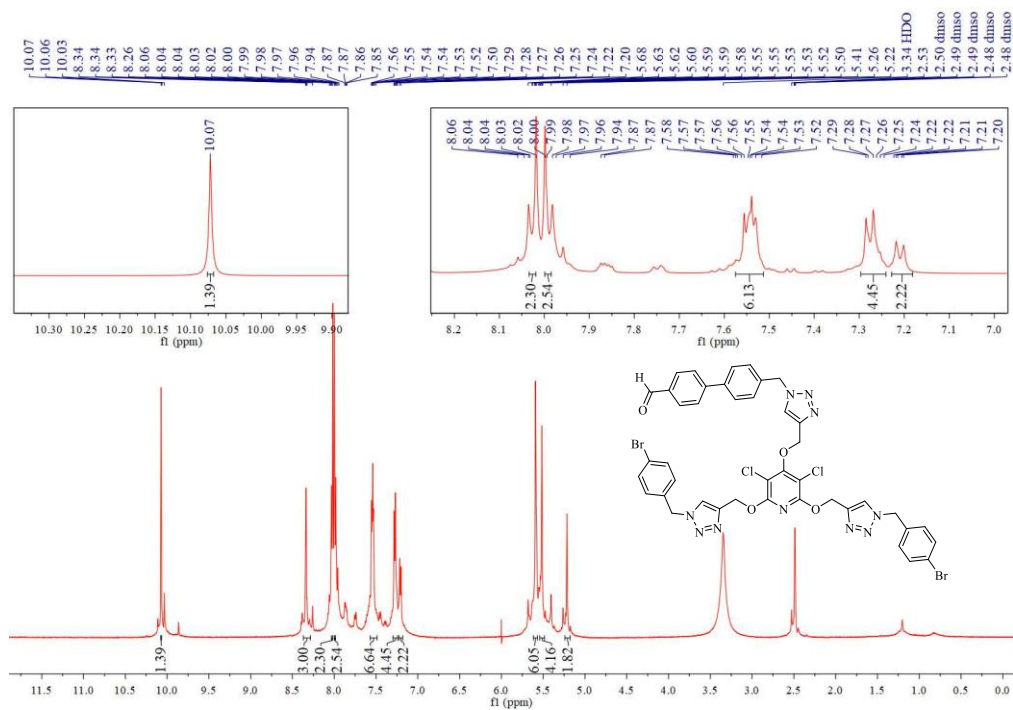

$^1\text{H}$  NMR spectrum of 4'-((4-(((2,6-bis((1-(4-bromobenzyl)-1H-1,2,3-triazol-4-yl)methoxy)-3,5-dichloropyridin-4-yl)oxy)methyl)-1H-1,2,3-triazol-1-yl)methyl)-[1,1'-biphenyl]-4-carbaldehyde **10f**

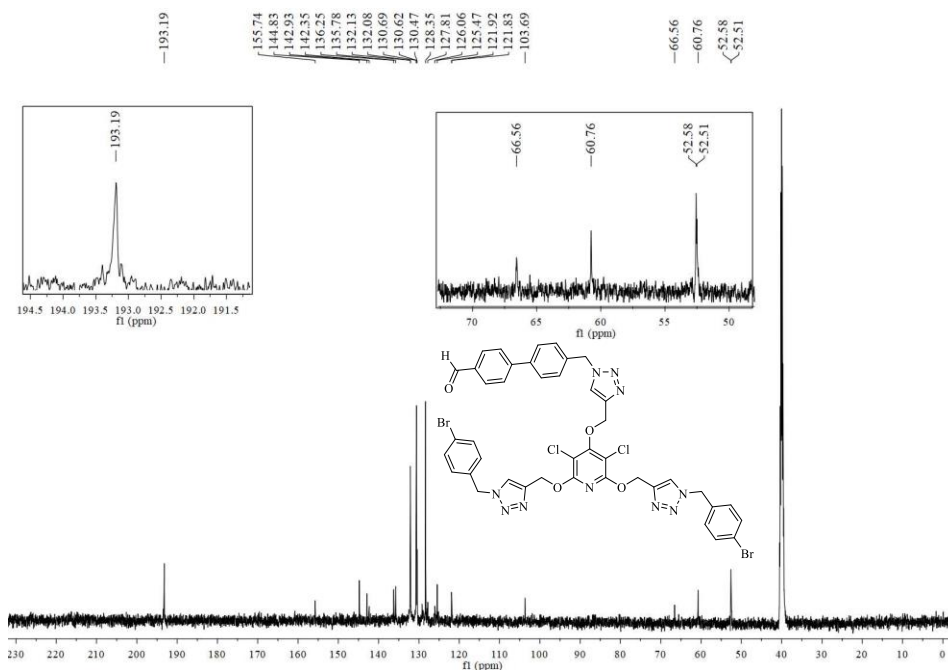

<sup>13</sup>C NMR spectrum of 4'-((4-(((2,6-bis((1-(4-bromobenzyl)-1H-1,2,3-triazol-4-yl)methoxy)-3,5-dichloropyridin-4-yl)oxy)methyl)-1H-1,2,3-triazol-1-yl)methyl)-[1,1'-biphenyl]-4-carbaldehyde **10f**

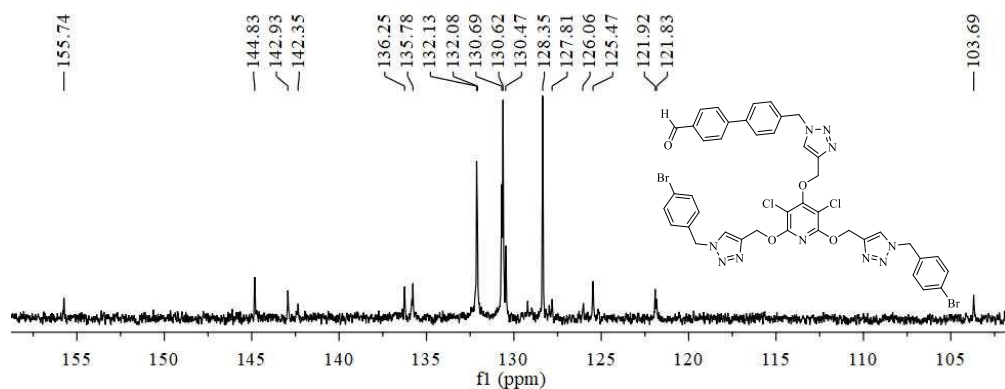

Expanded <sup>13</sup>C NMR spectrum of 4'-((4-(((2,6-bis((1-(4-bromobenzyl)-1H-1,2,3-triazol-4-yl)methoxy)-3,5-dichloropyridin-4-yl)oxy)methyl)-1H-1,2,3-triazol-1-yl)methyl)-[1,1'-biphenyl]-4-carbaldehyde **10f**

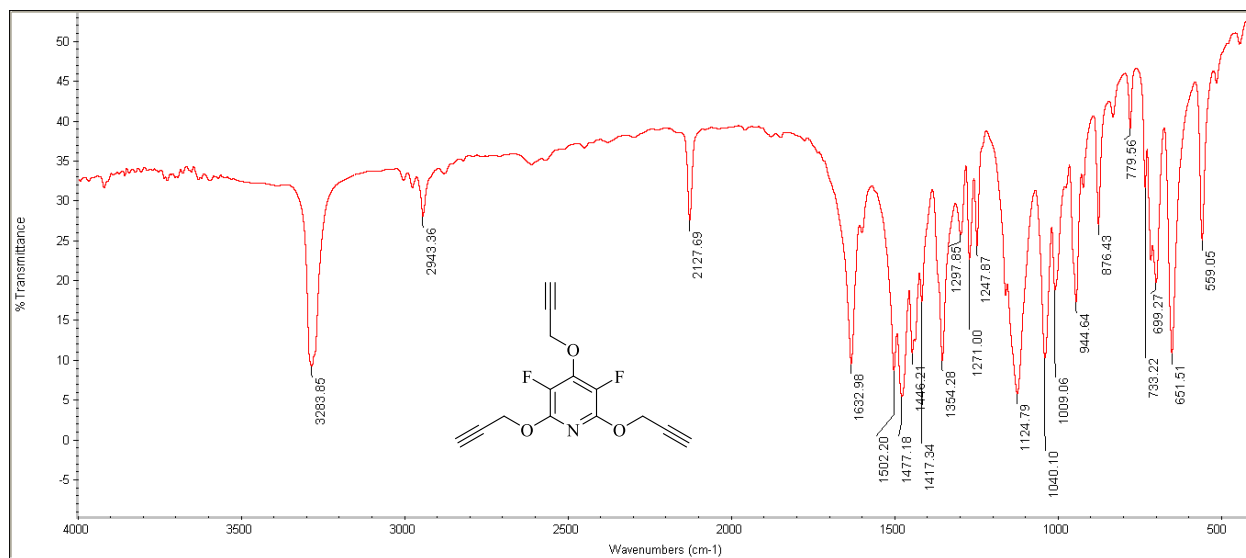

FT-IR spectrum of **3a**

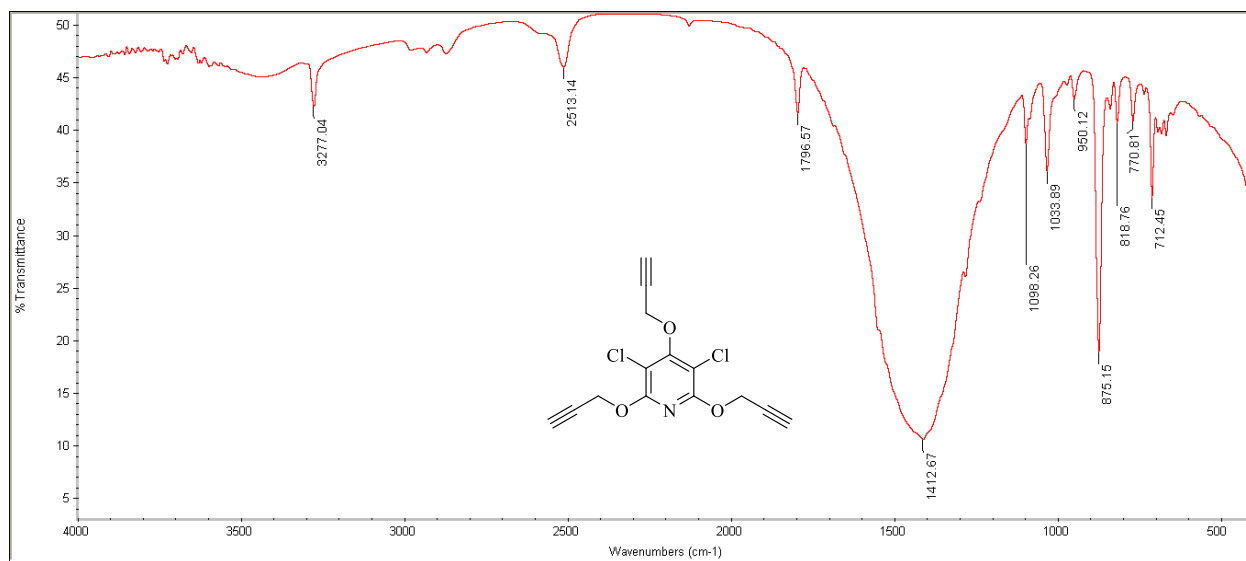

FT-IR spectrum of **3b**

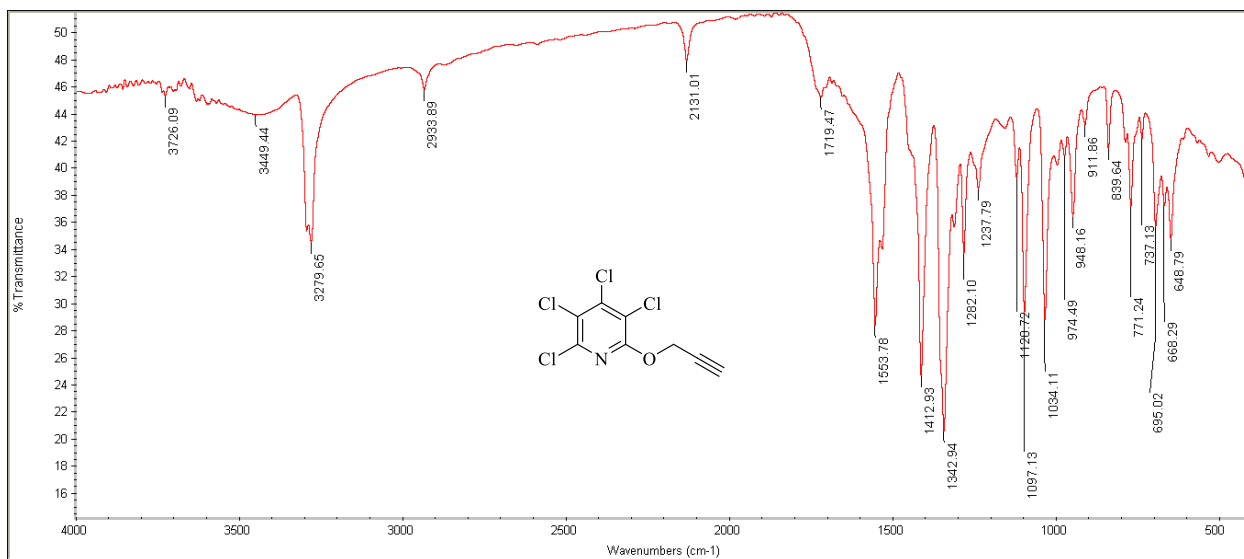

FT-IR spectrum of **3c**

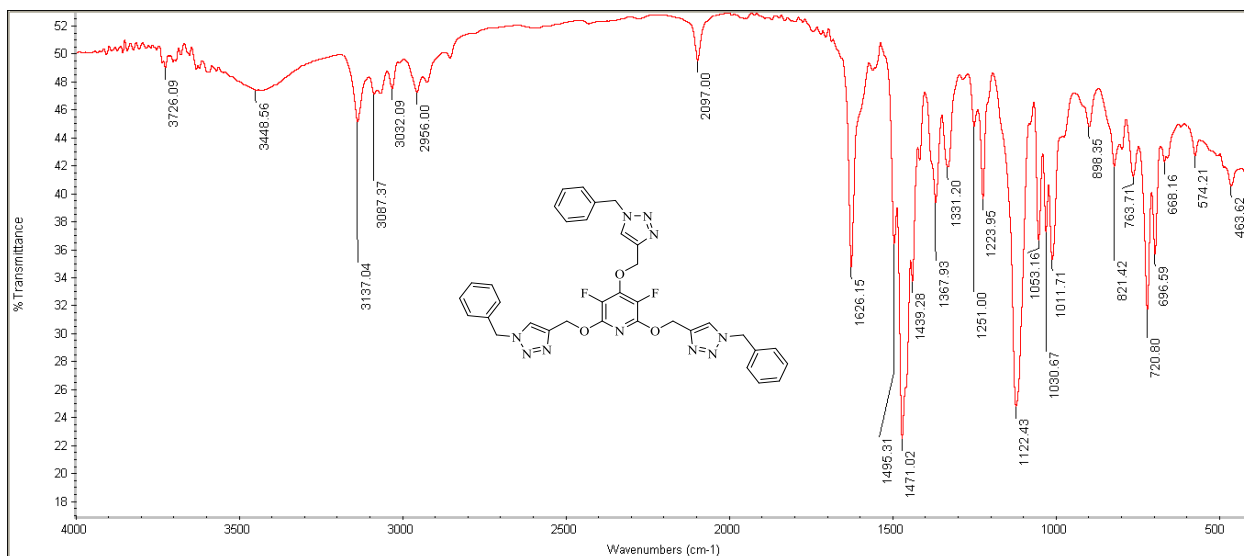

FT-IR spectrum of **5a**

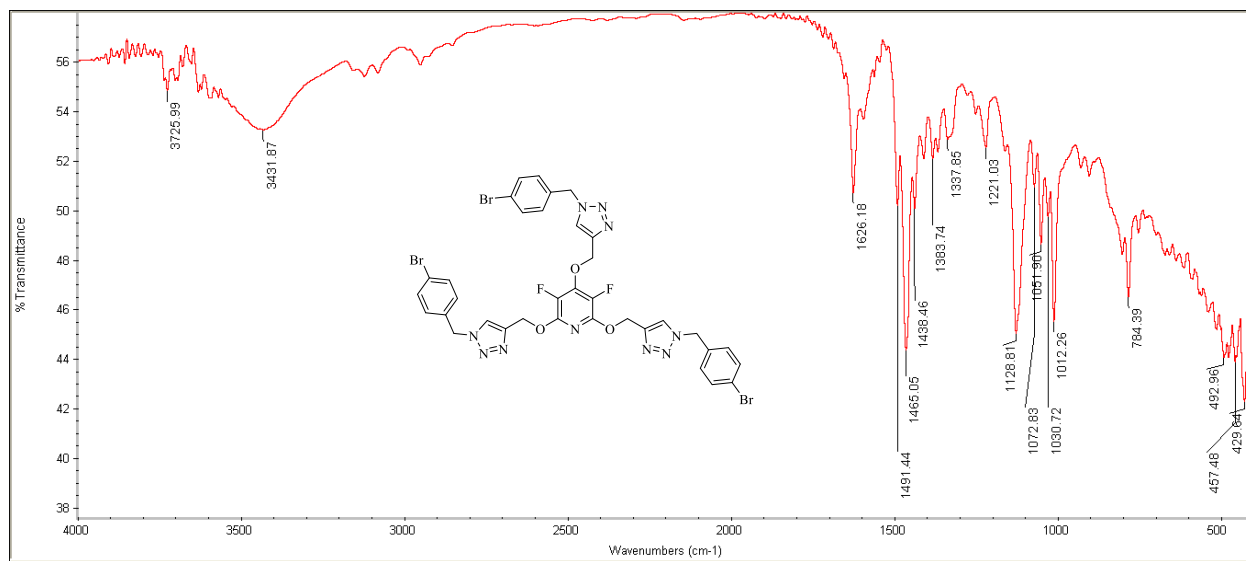

FT-IR spectrum of **5b**

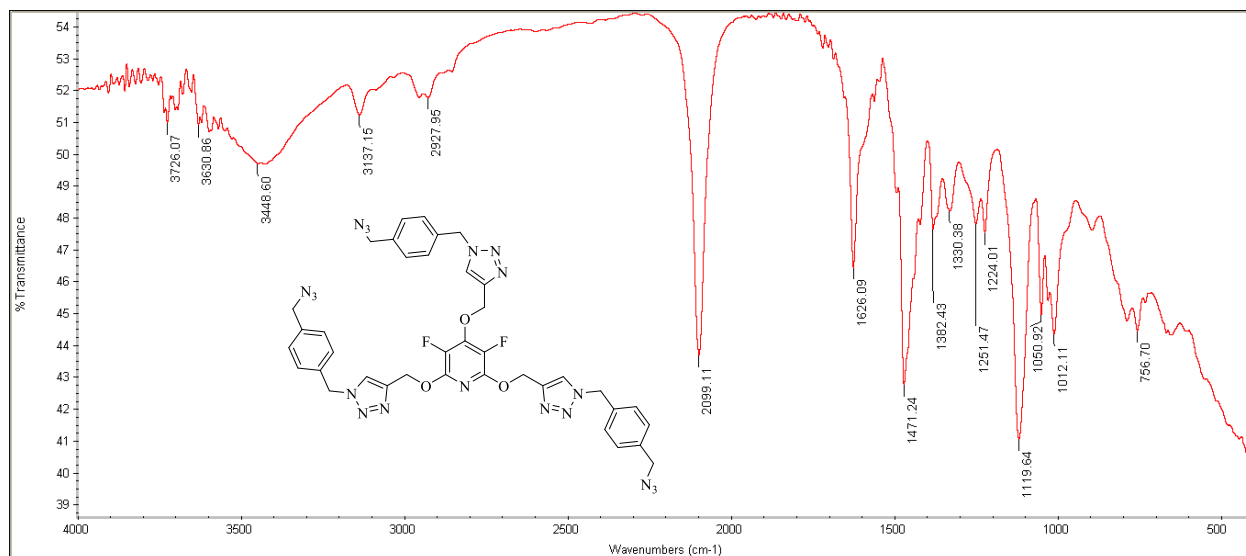

FT-IR spectrum of **5c**



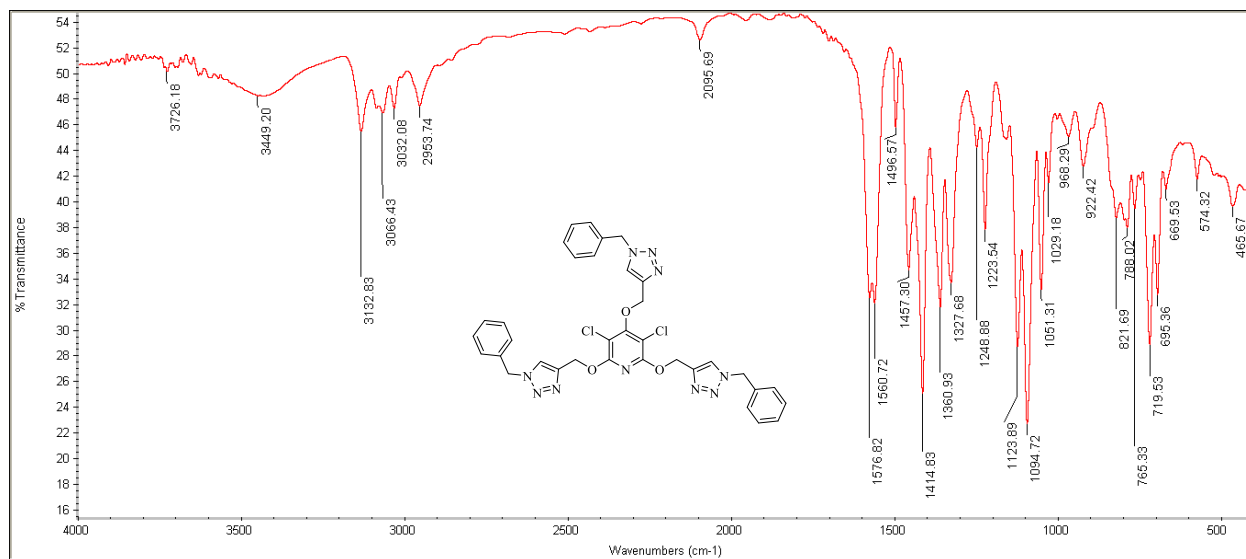

FT-IR spectrum of **5d**

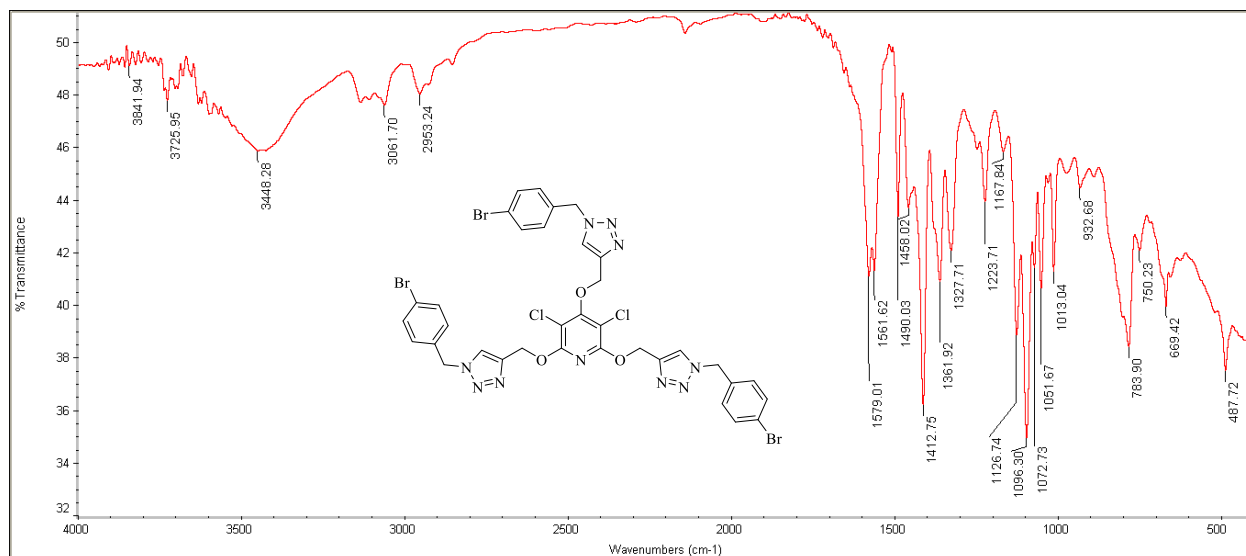

FT-IR spectrum of **5e**

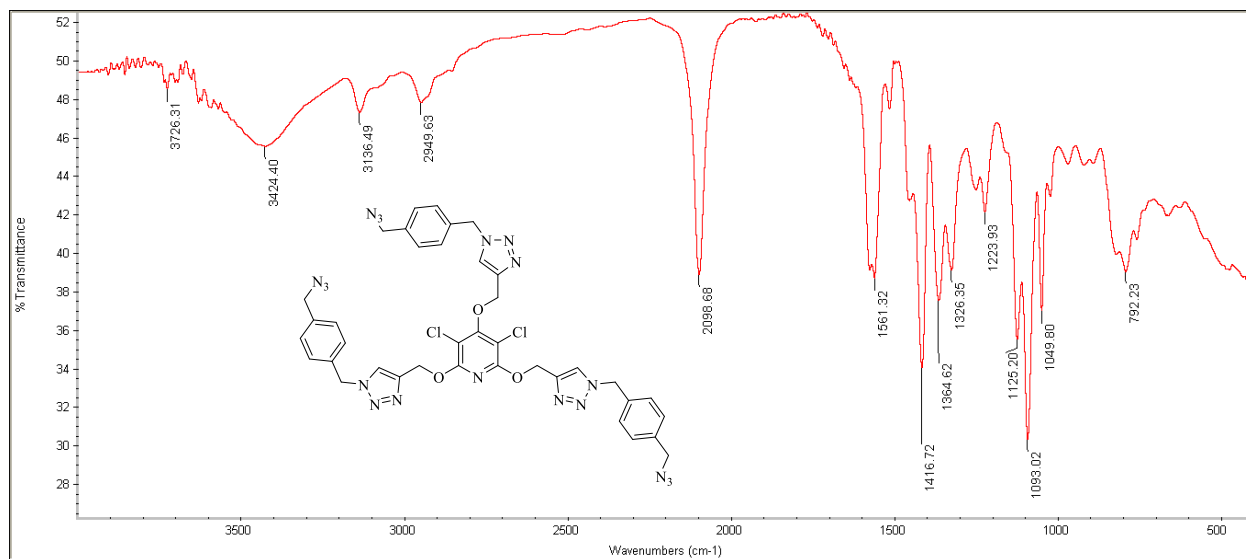

FT-IR spectrum of **5f**

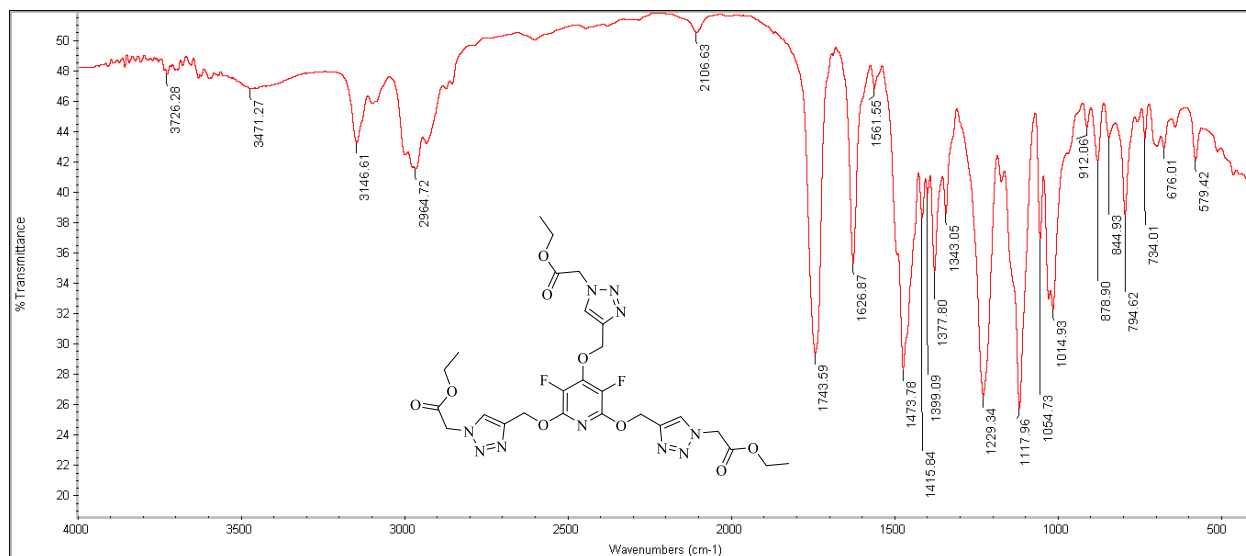

FT-IR spectrum of **7a**

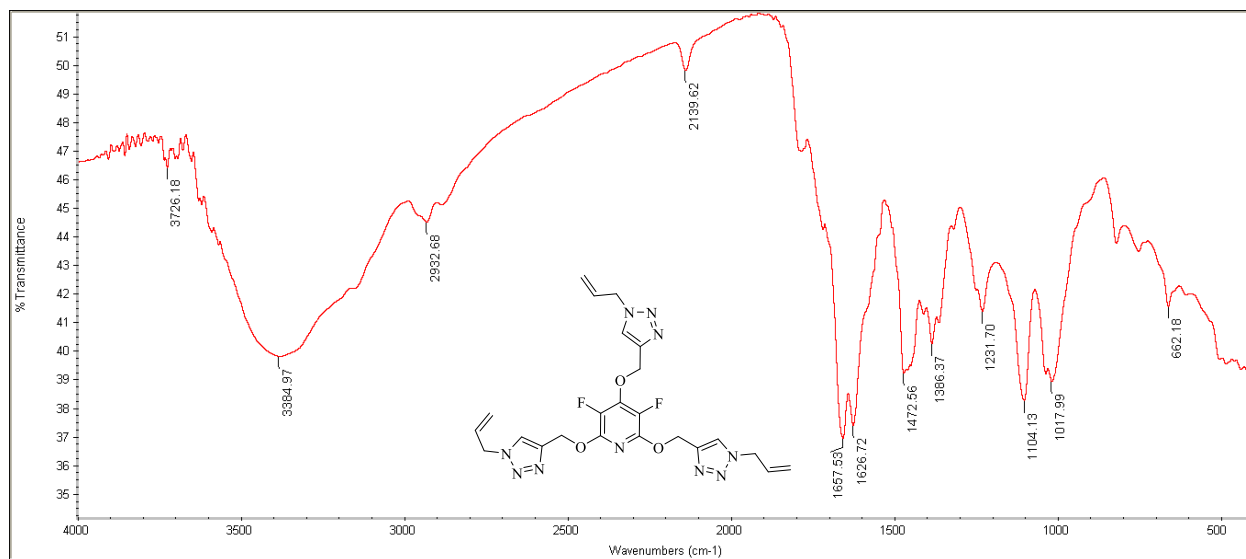

FT-IR spectrum of **7b**

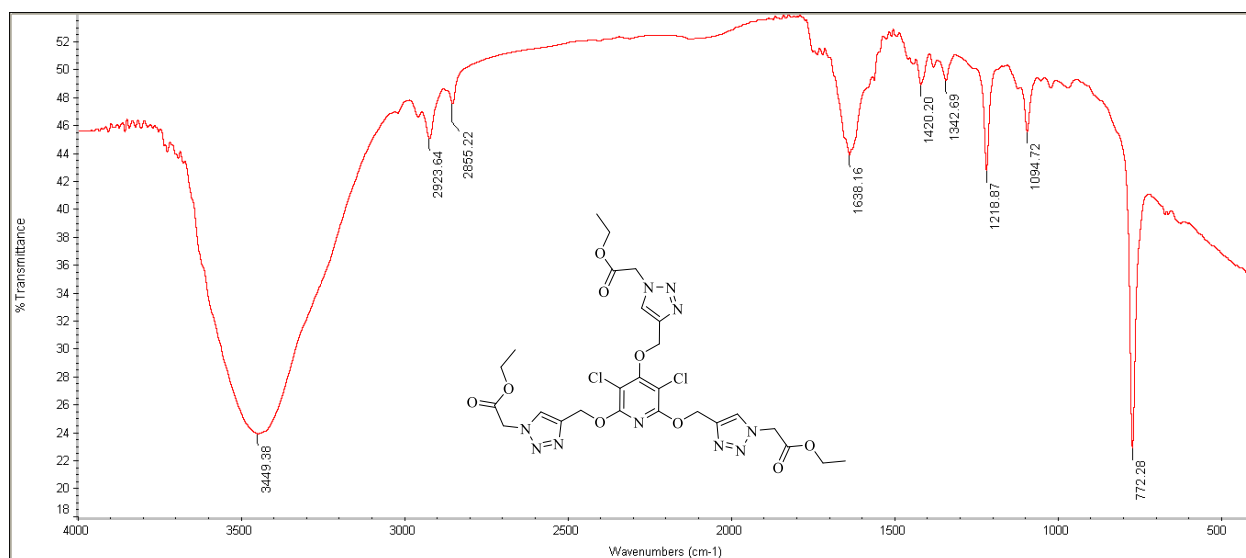

FT-IR spectrum of **7c**

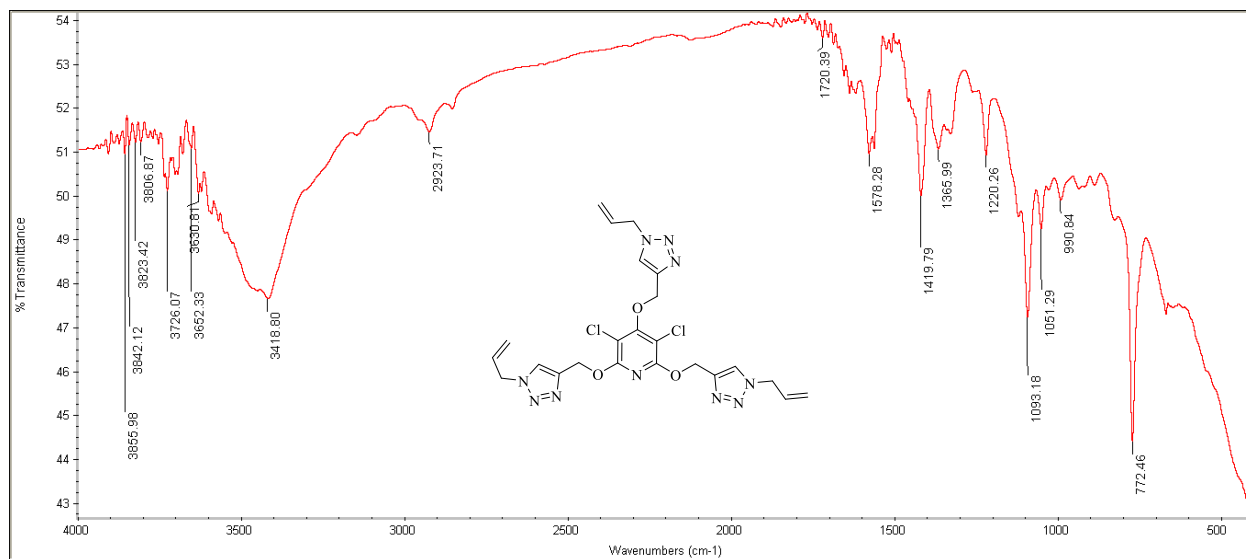

FT-IR spectrum of **7d**

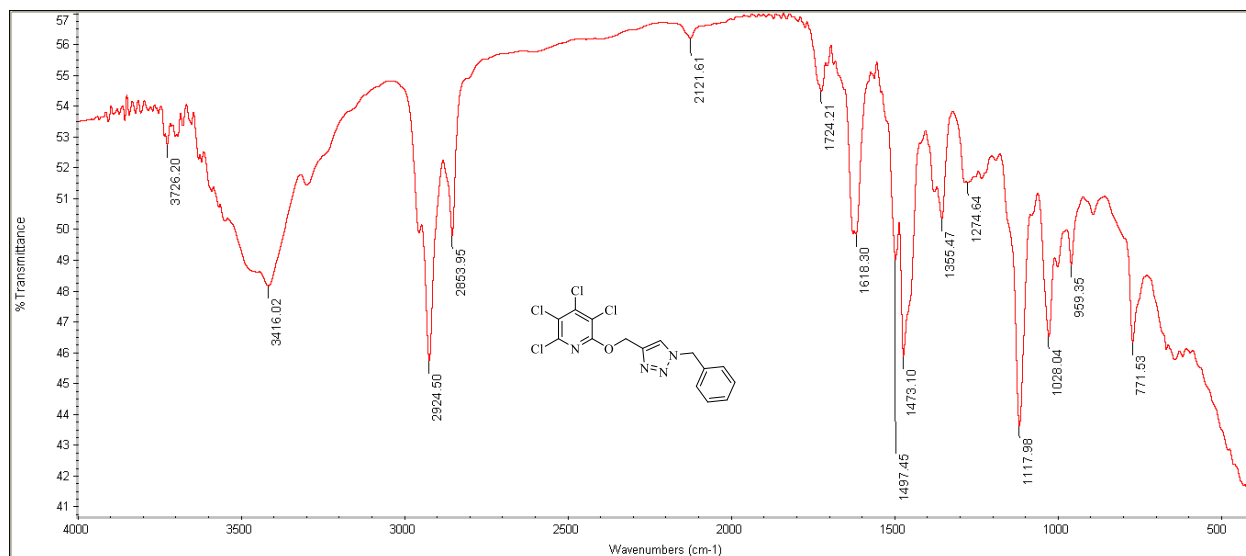

FT-IR spectrum of **8a**

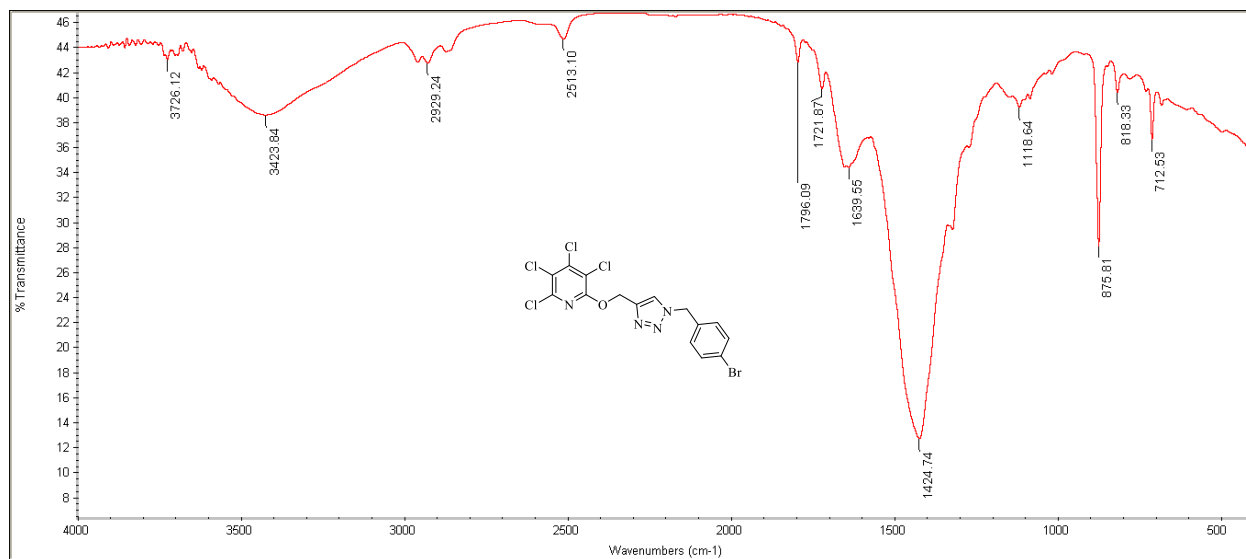

FT-IR spectrum of **8b**

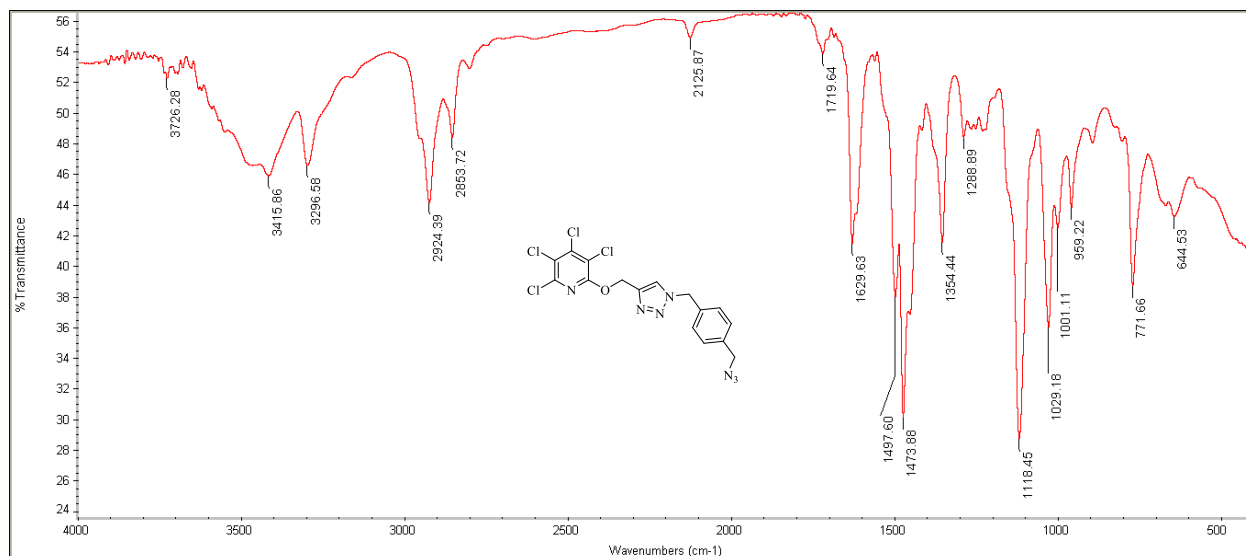

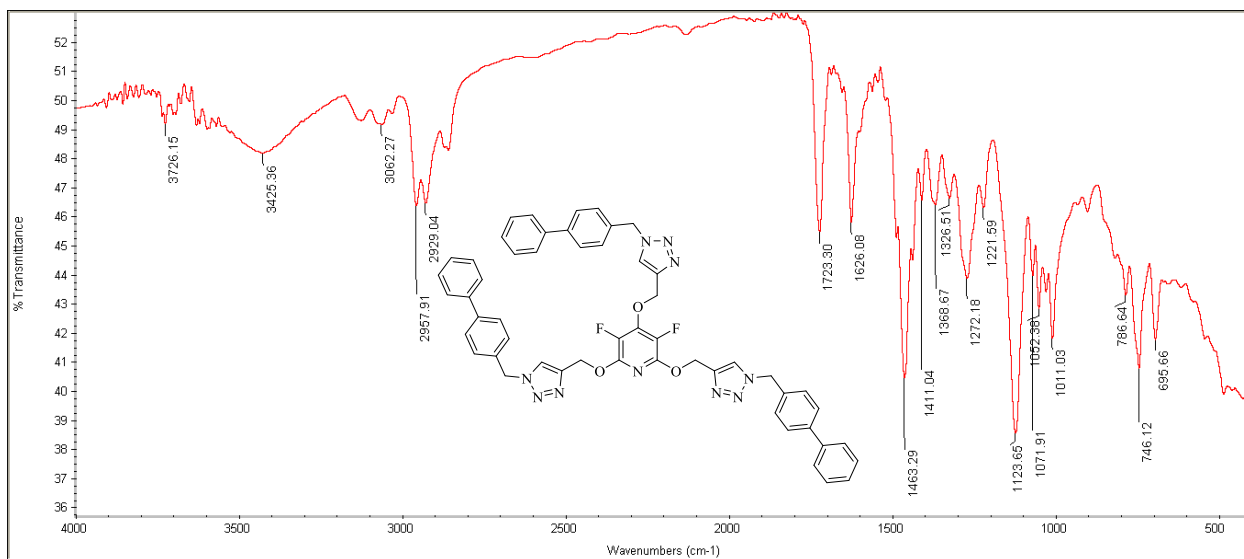

FT-IR spectrum of **10a**

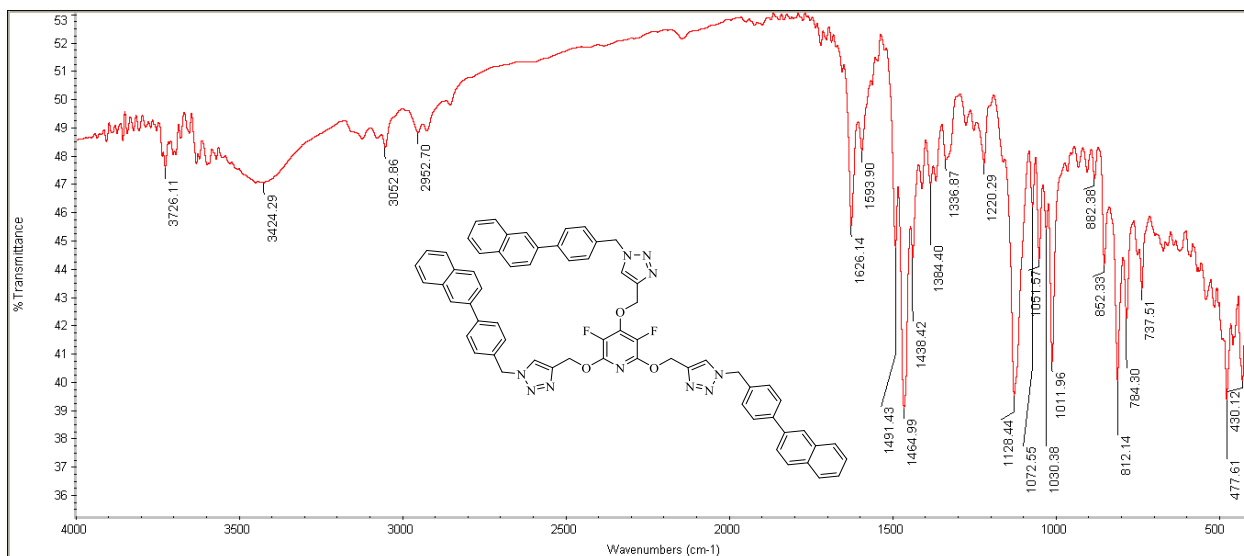

FT-IR spectrum of **10b**

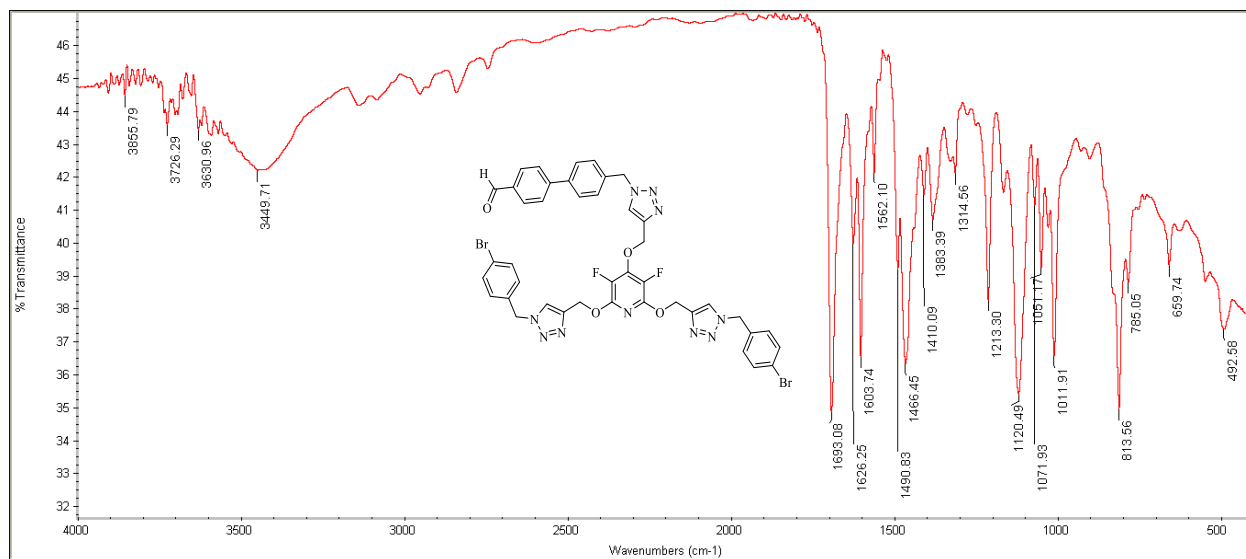

FT-IR spectrum of **10c**

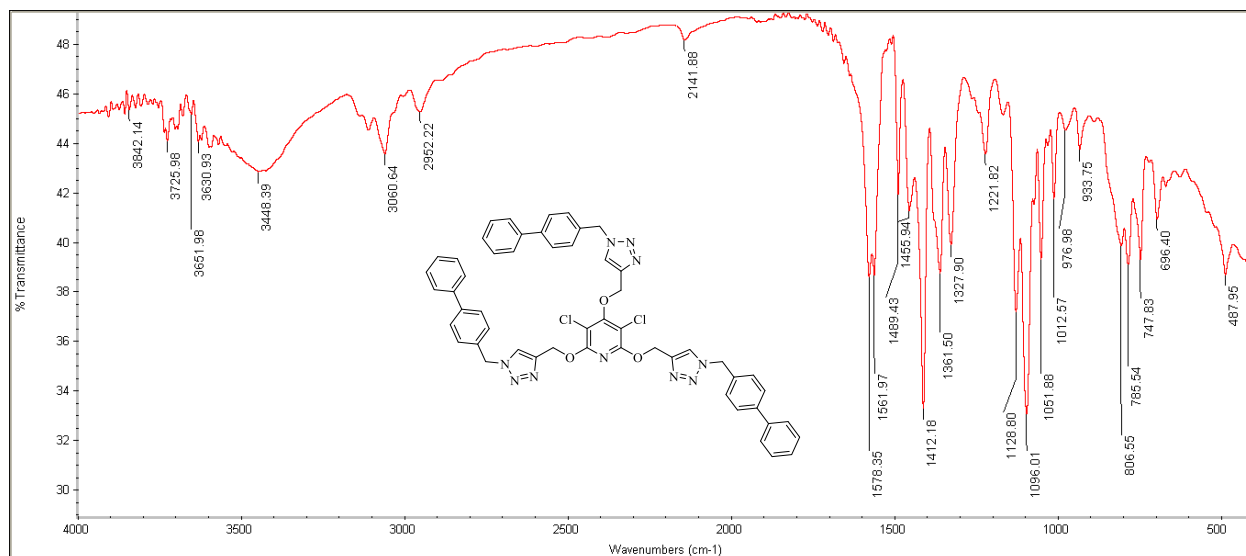

FT-IR spectrum of **10d**

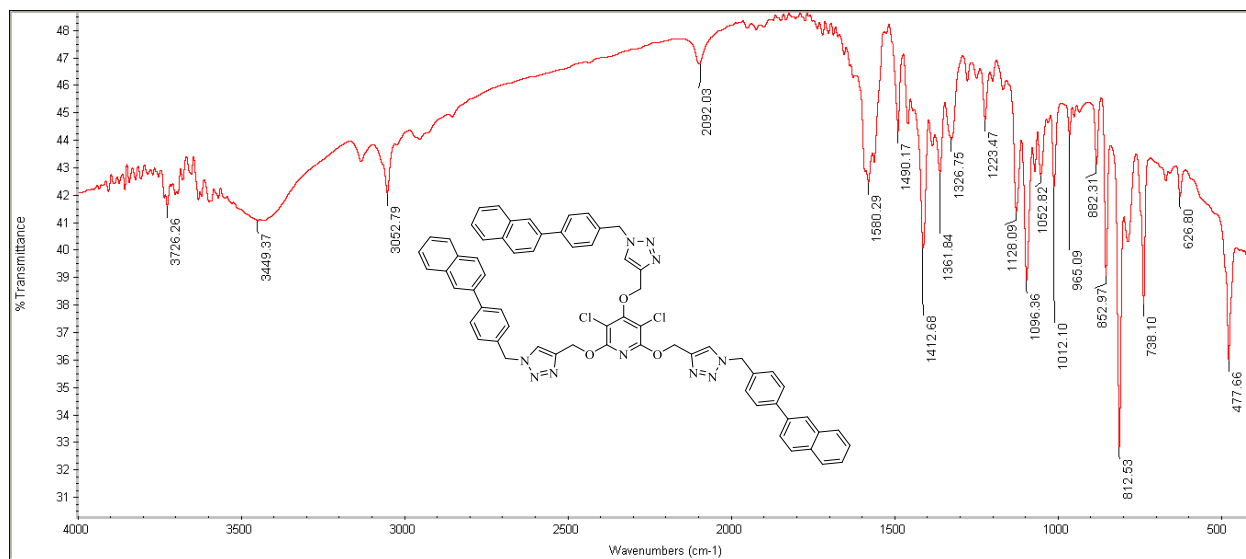

FT-IR spectrum of **10e**

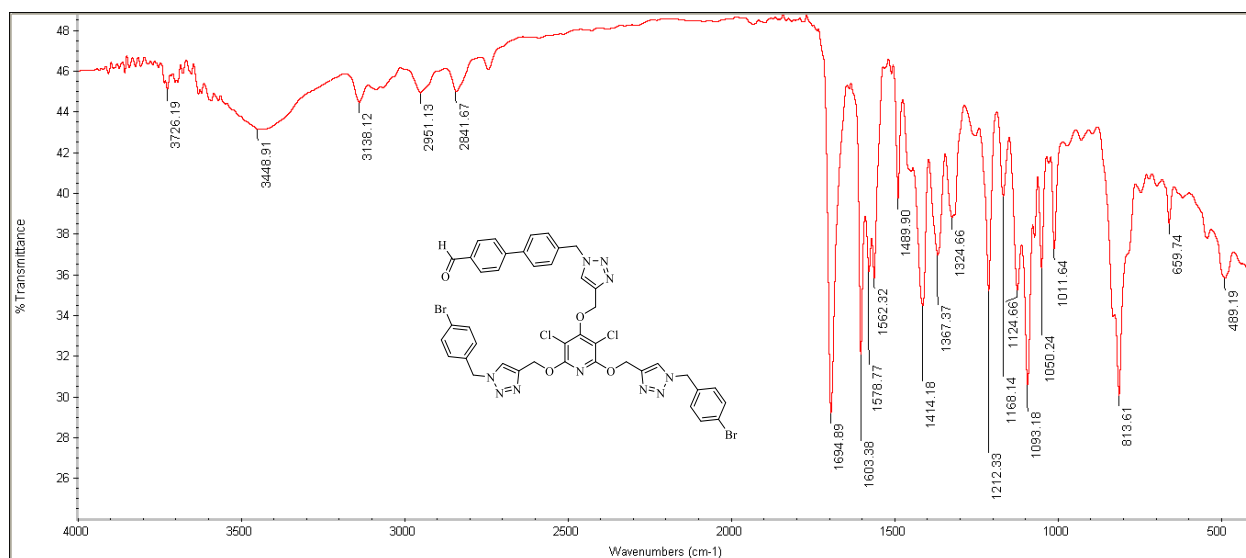

FT-IR spectrum of **10f**
